# Supplementary material for: Synthesis of 2-selenyl(sulfenyl)benzofurans via Cu-catalyzed tandem reactions of 2-(gem-dibromovinyl)phenols with diorganyl diselenides(disulfides)
Source: Royal Society of Chemistry journal article supplement (doi:10.1039/c3ra23361h), 2013-01-01
Supplement: c3ra23361h.pdf [file c3ra23361h.pdf]

## ***Supporting Information***

# **Synthesis of 2-Selenyl(Sulfenyl)benzofurans via Cu-Catalyzed Tandem Reactions of 2-(*gem*-Dibromovinyl)phenols with Diorganyl Diselenides(Disulfides)**

Jie Liu,<sup>a,b</sup> Wei Chen,<sup>a</sup> and Lei Wang<sup>\*a,c</sup>

<sup>a</sup> *Department of Chemistry, Huaibei Normal University, Huaibei, Anhui 235000, P. R. China*

<sup>b</sup> *College of Chemistry, Chemical Engineering and Materials Science, Soochow University, Suzhou, Jiangsu 215123 P.R. China*

<sup>c</sup> *State Key Laboratory of Organometallic Chemistry, Shanghai Institute of Organic Chemistry, Chinese Academy of Sciences, Shanghai 200032 P.R. China*

[leiwang@chnu.edu.cn](mailto:leiwang@chnu.edu.cn)

### ***Table of Contents for Supporting Information***

|                                                                              |   |
|------------------------------------------------------------------------------|---|
| 1. D-Labeled spectra of substrate and product.....                           | 2 |
| 2. <sup>1</sup> H, <sup>13</sup> C NMR and HRMS spectra of the products..... | 4 |

## 1. D-Labeled $^1\text{H}$ NMR spectra of substrate and product

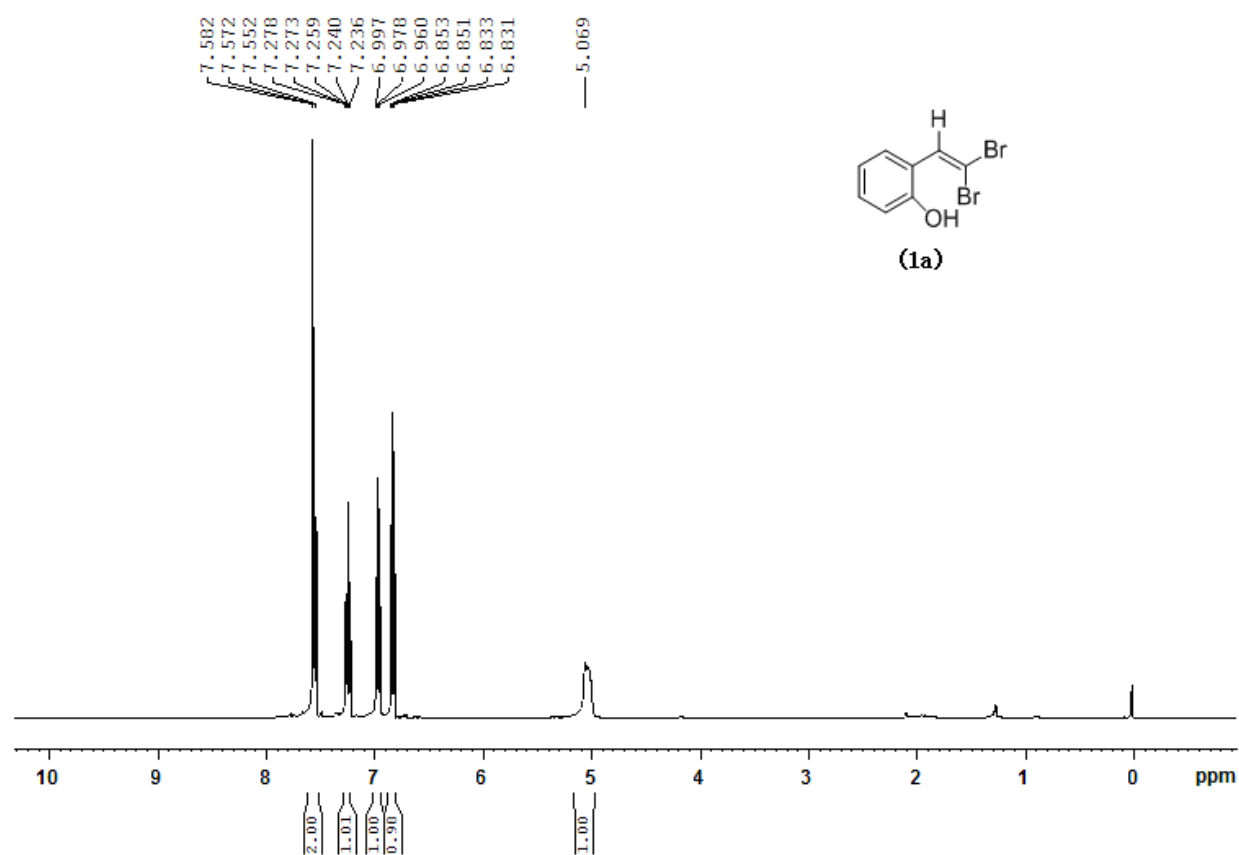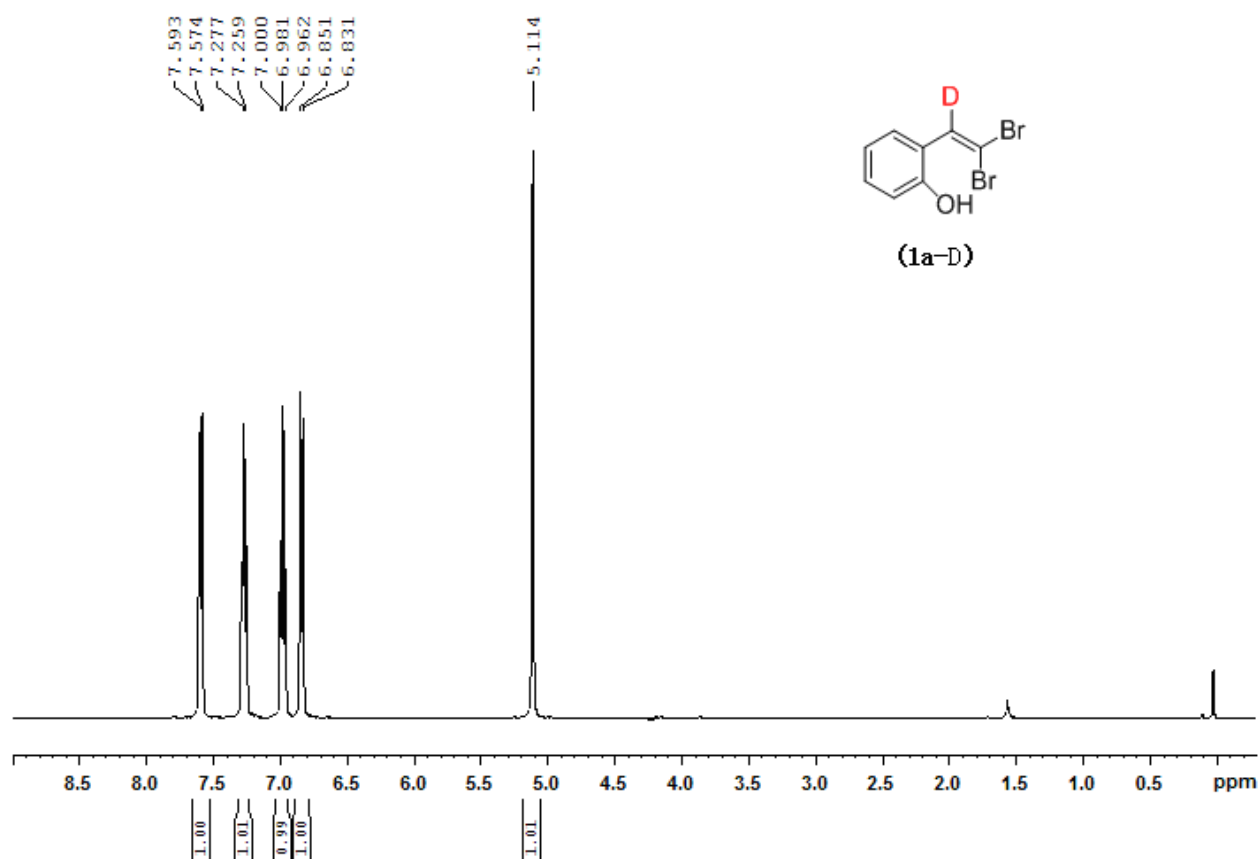

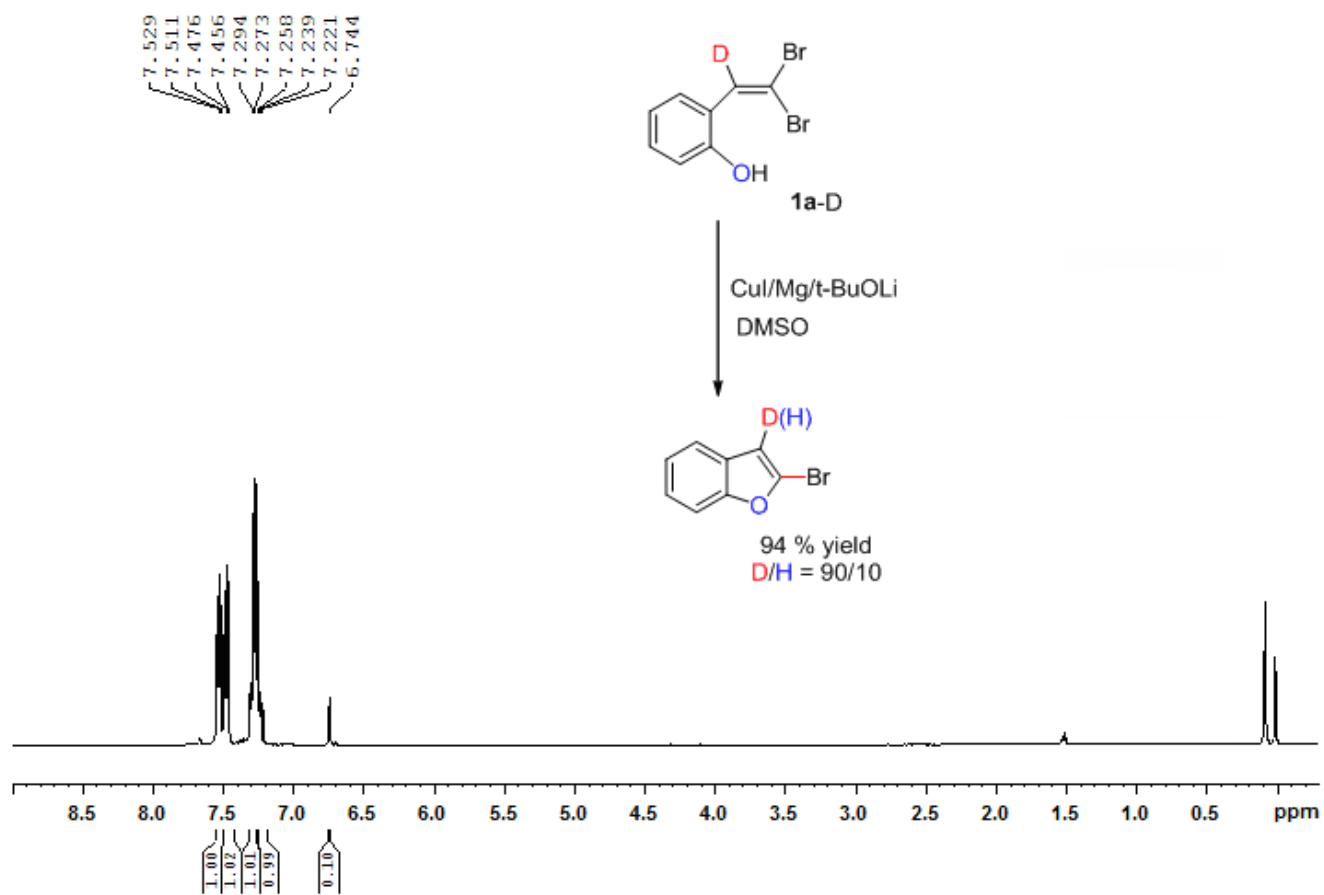

## 2. $^1\text{H}$ , $^{13}\text{C}$ NMR and HRMS spectra

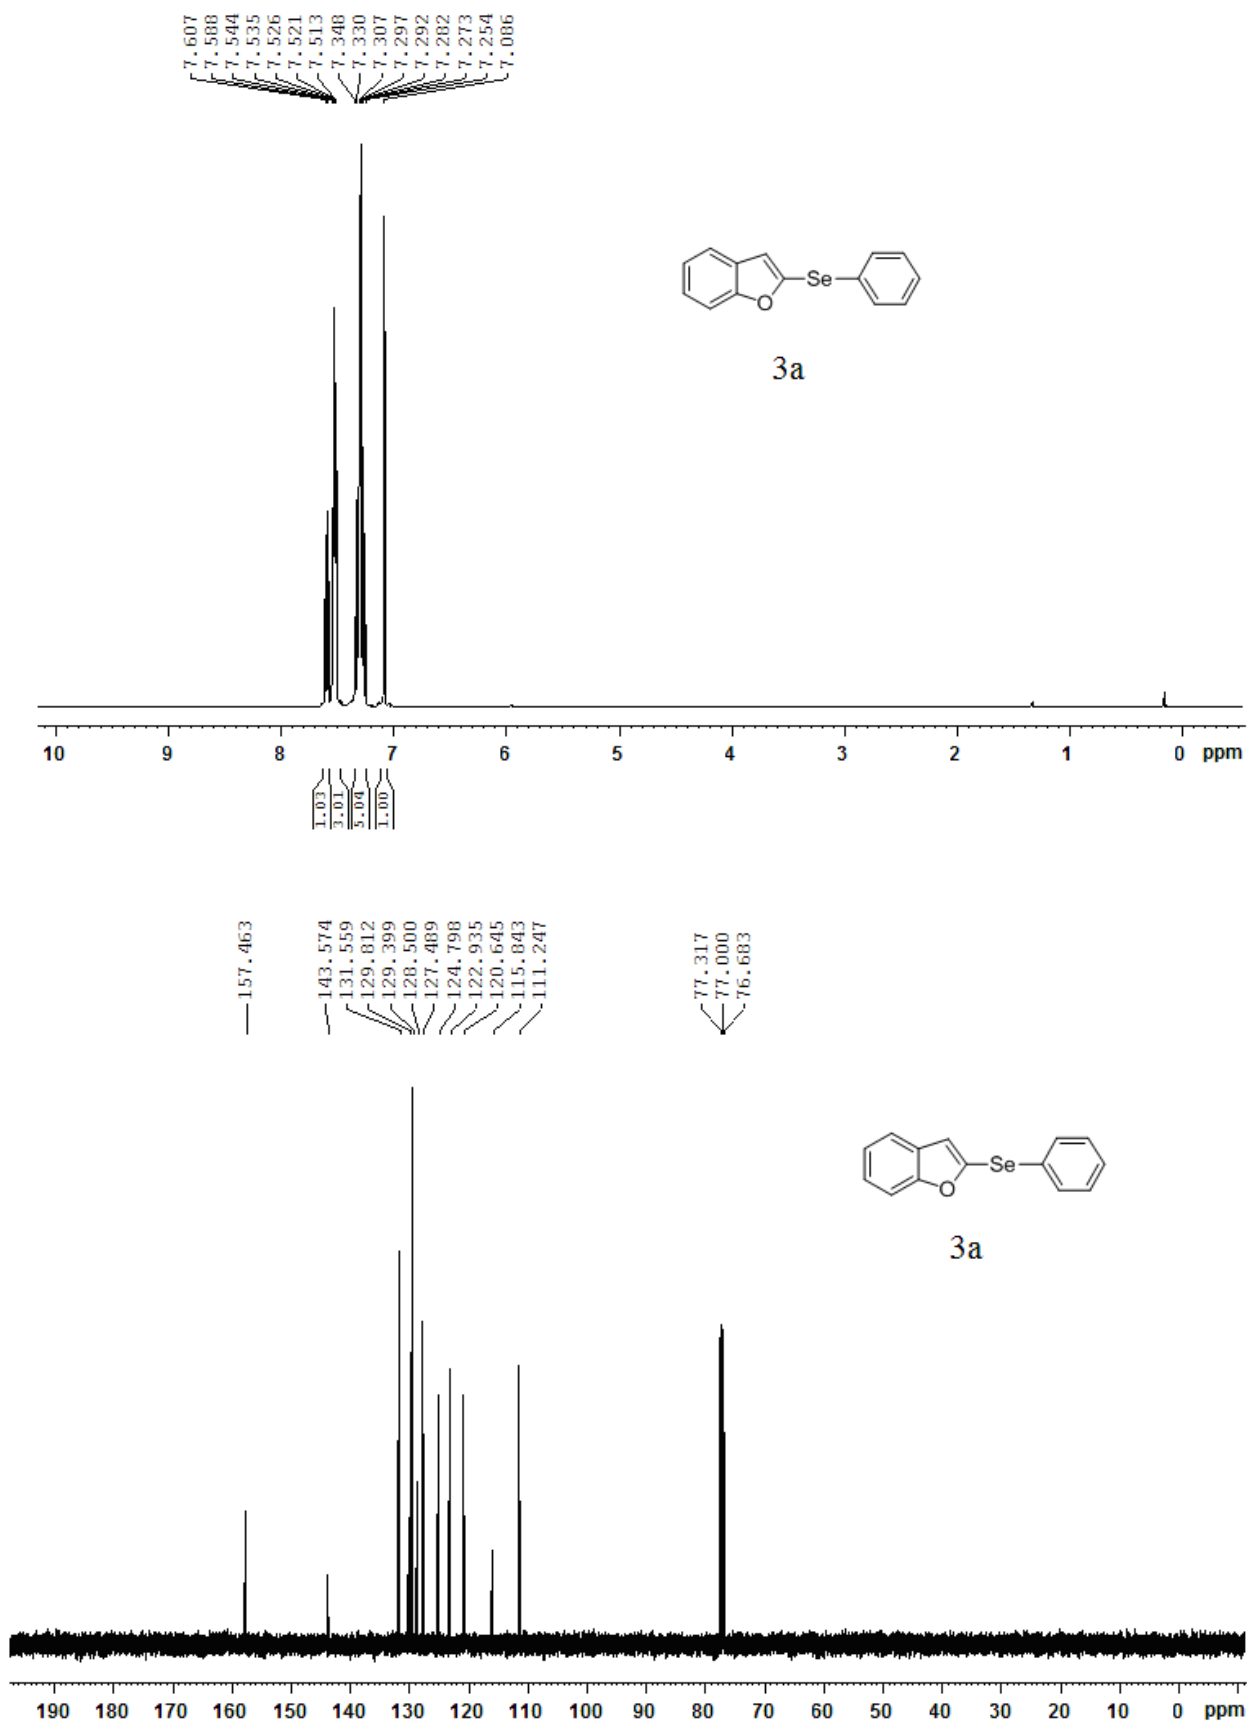

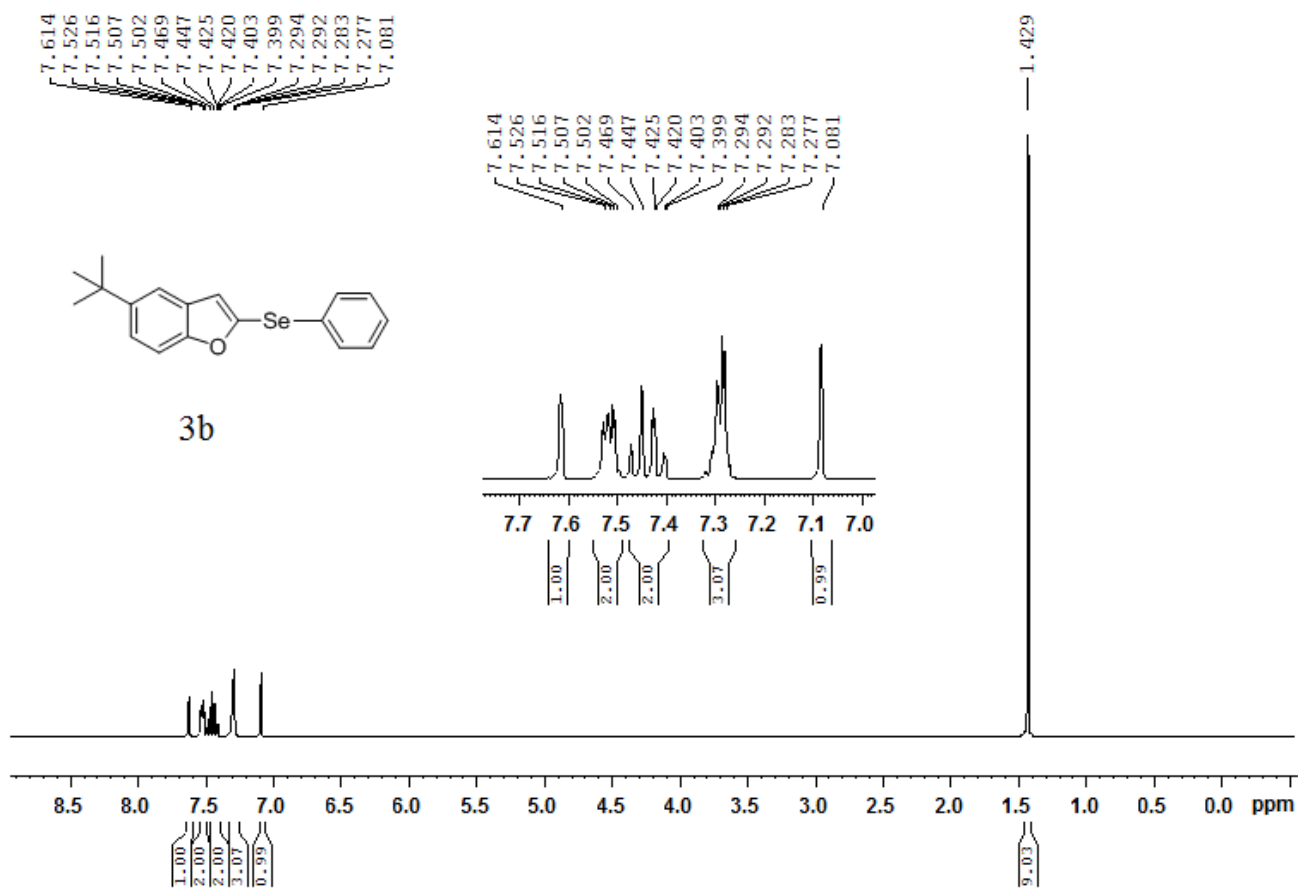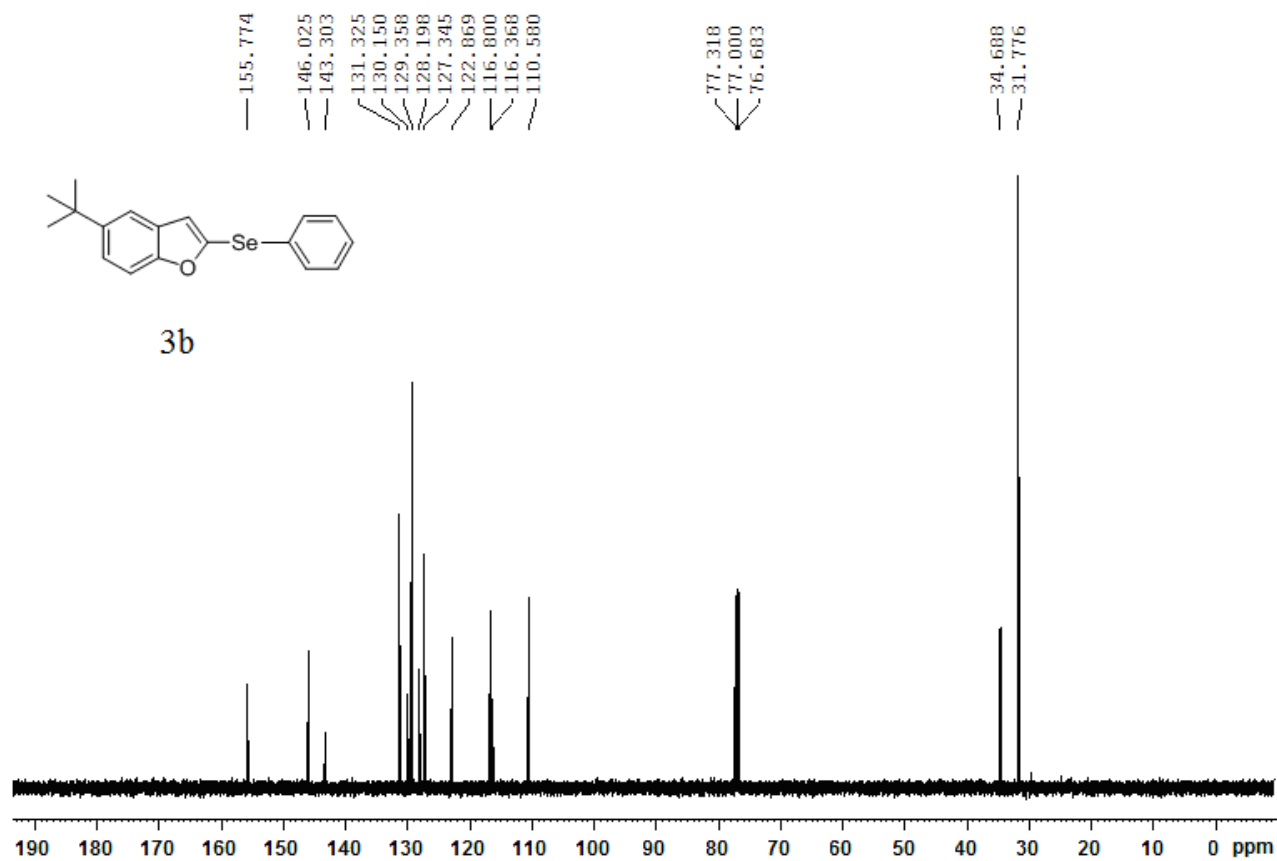

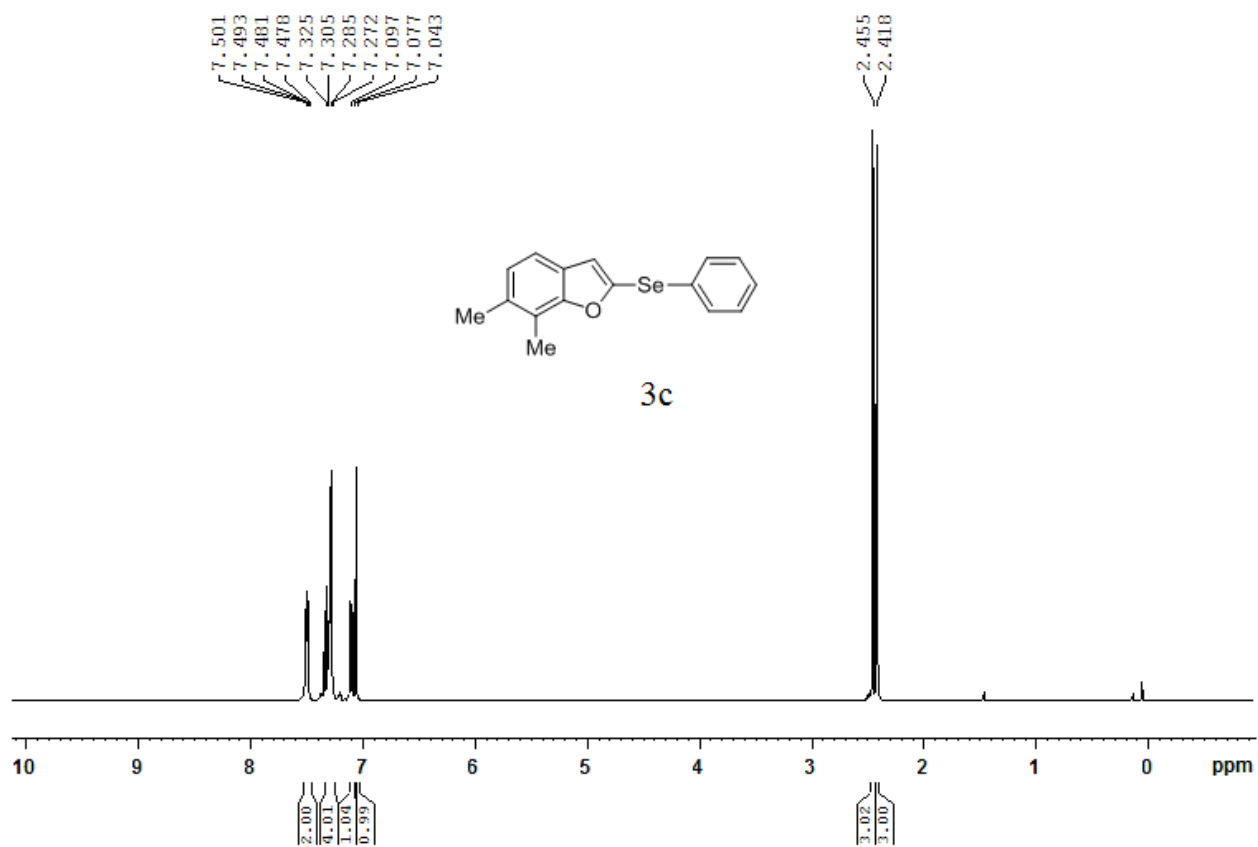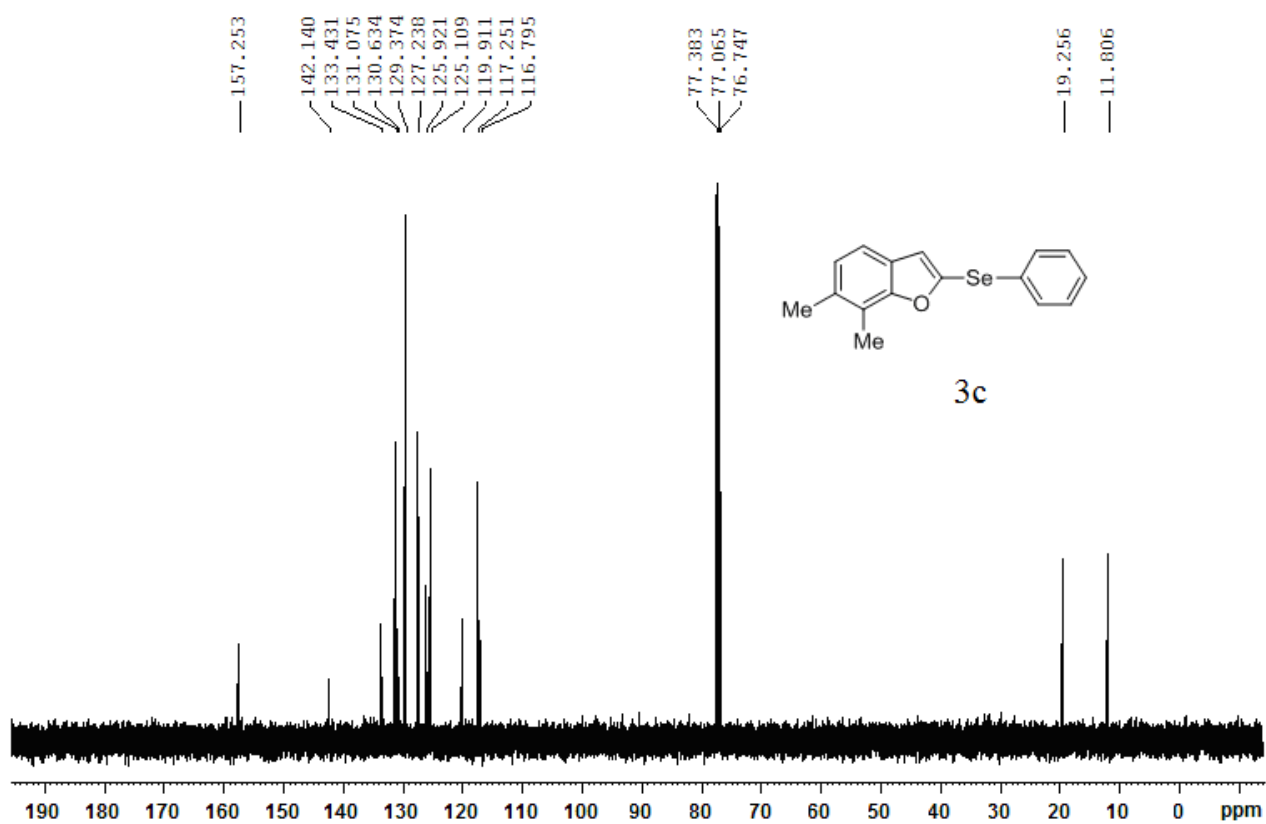

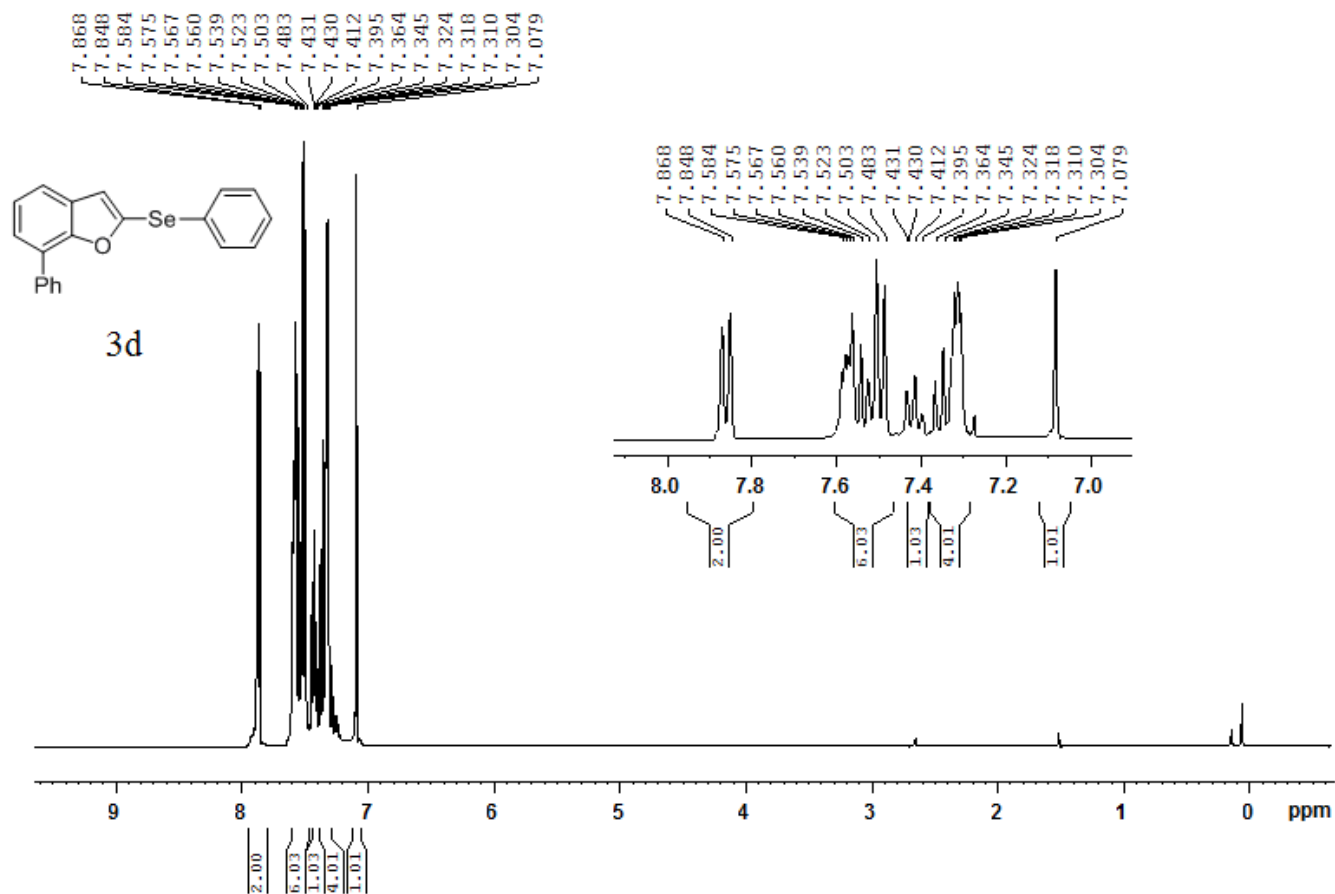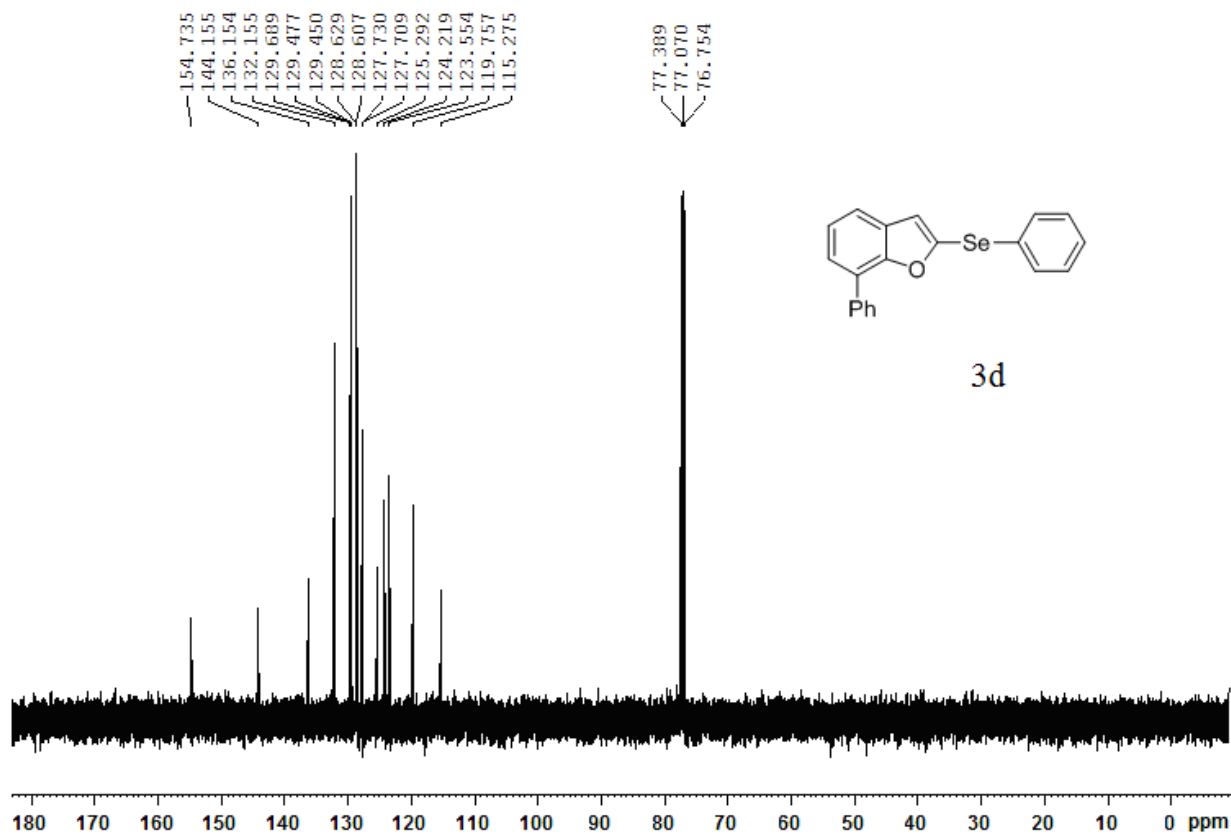

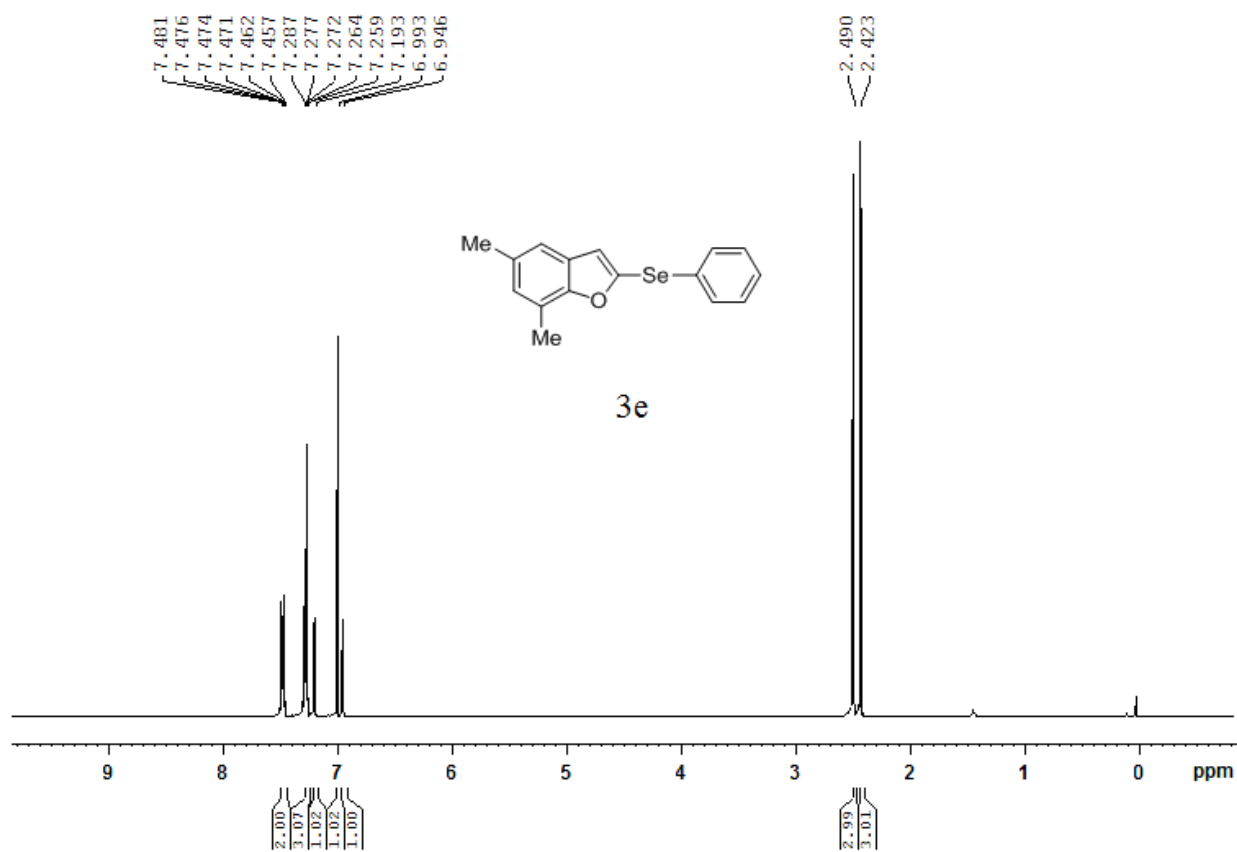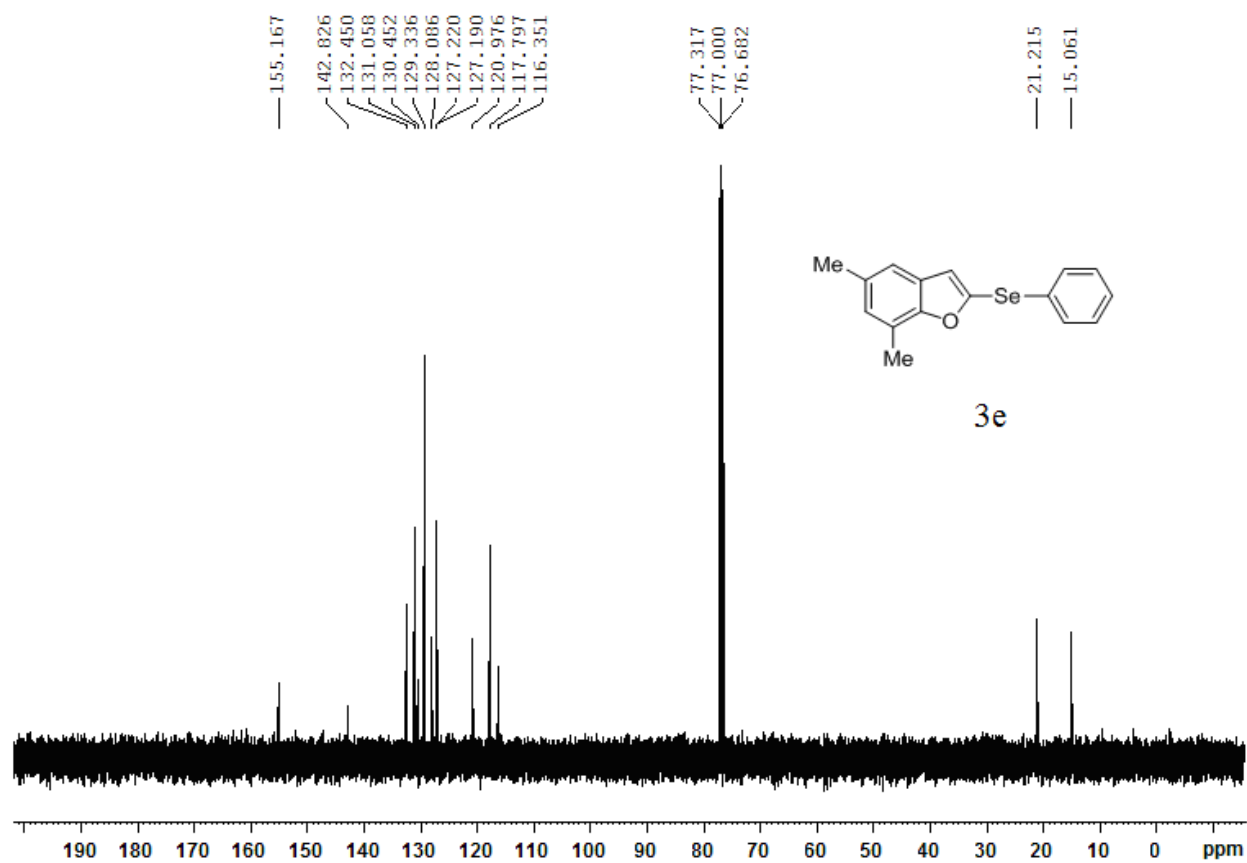



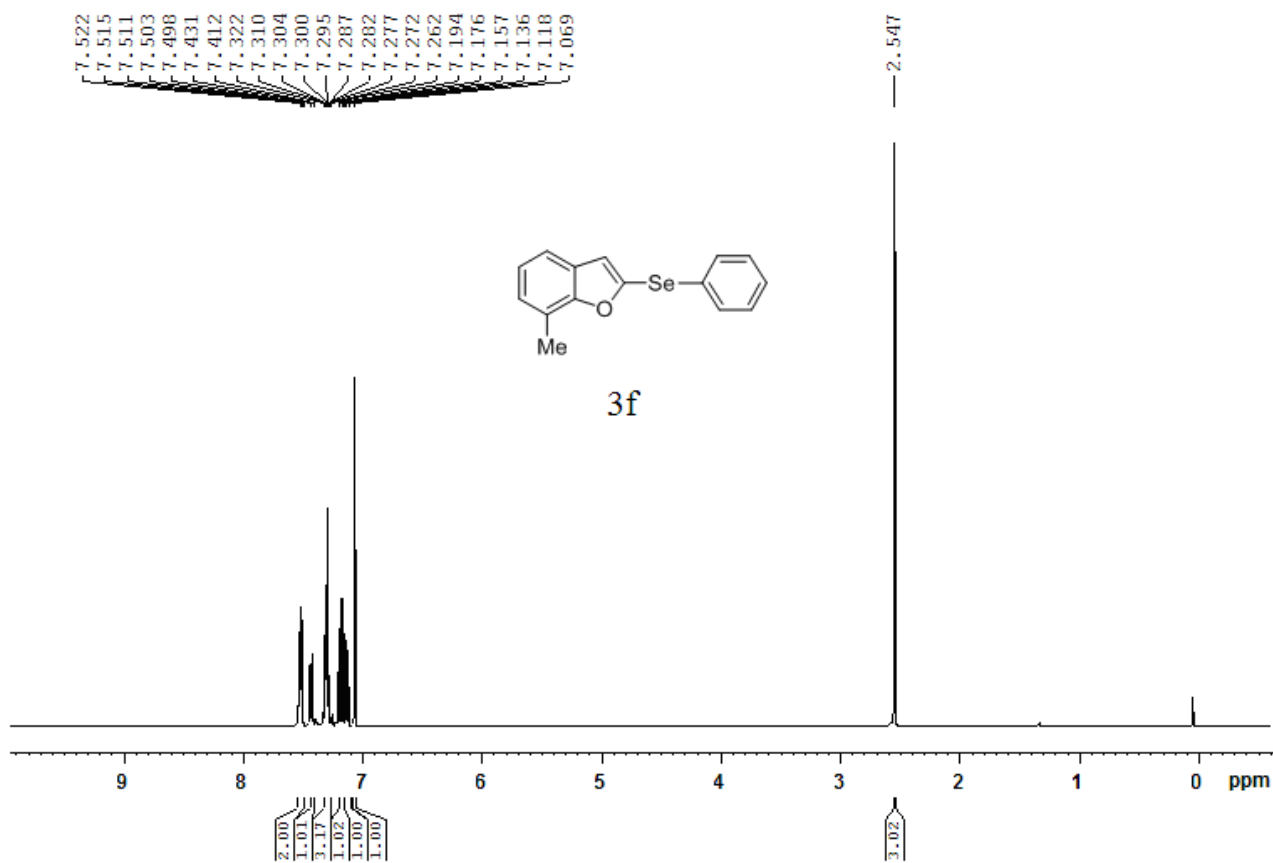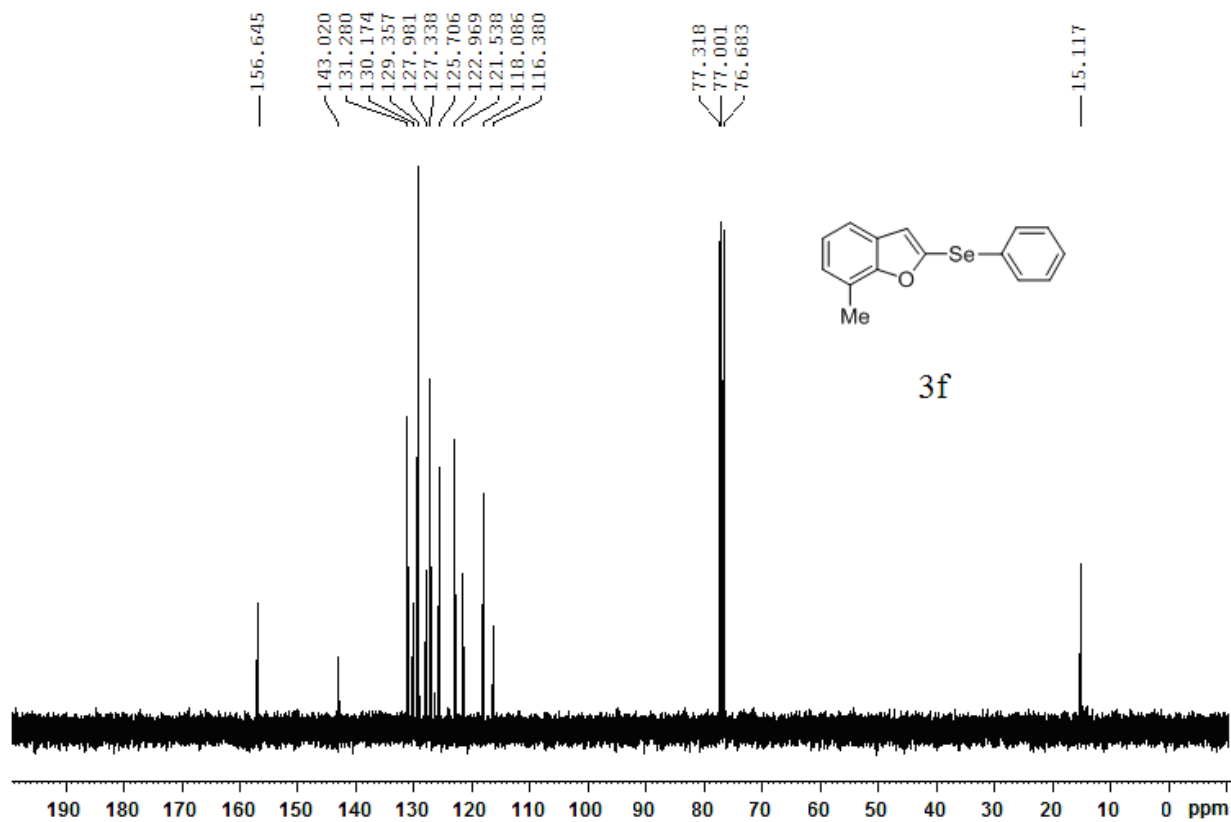

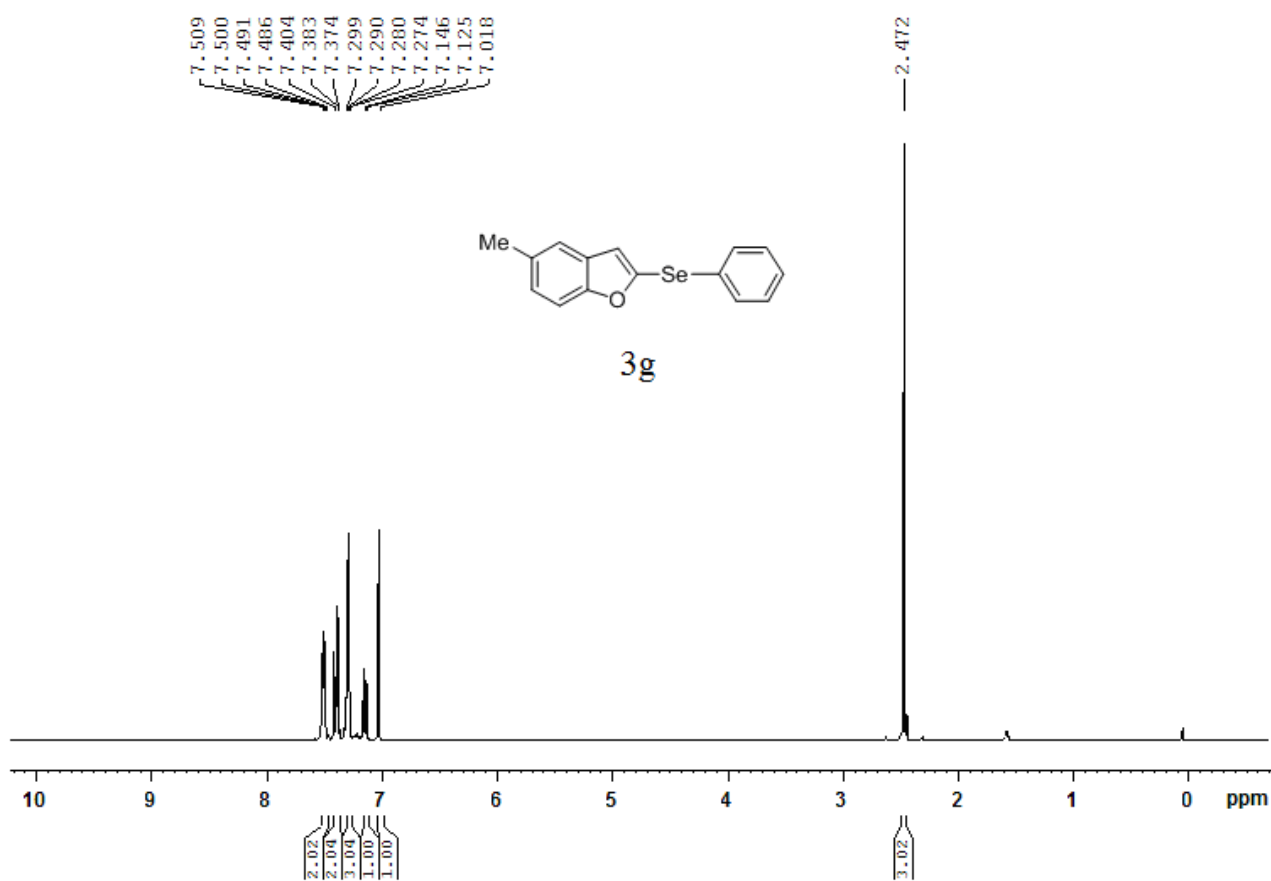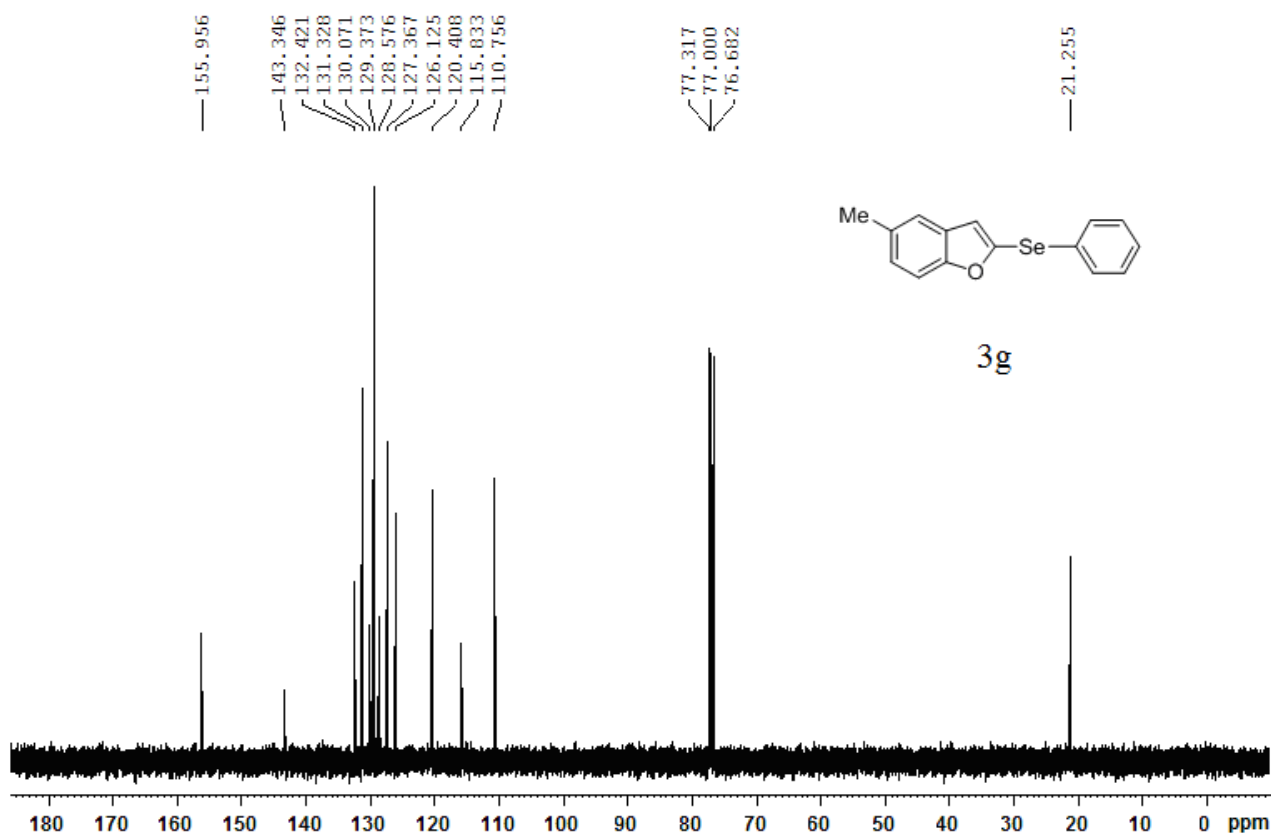

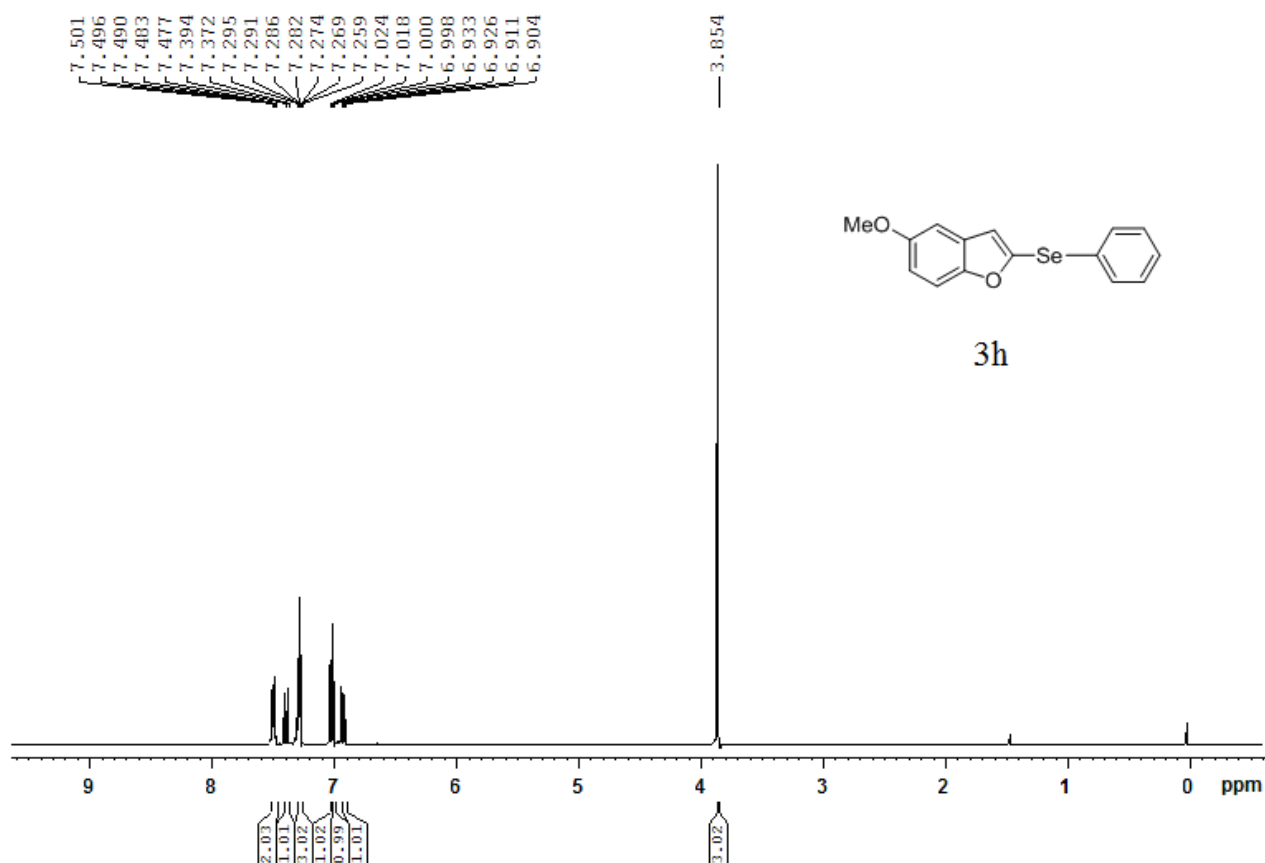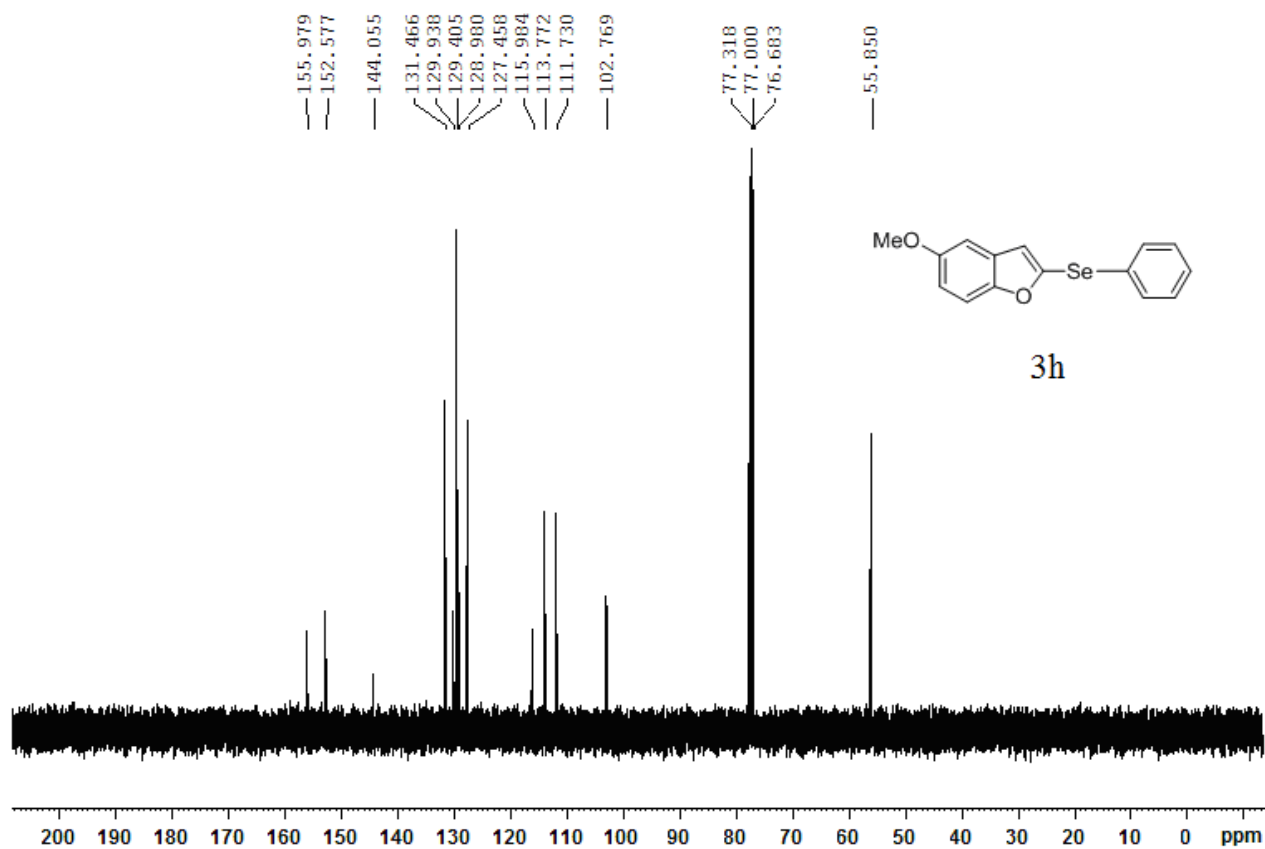

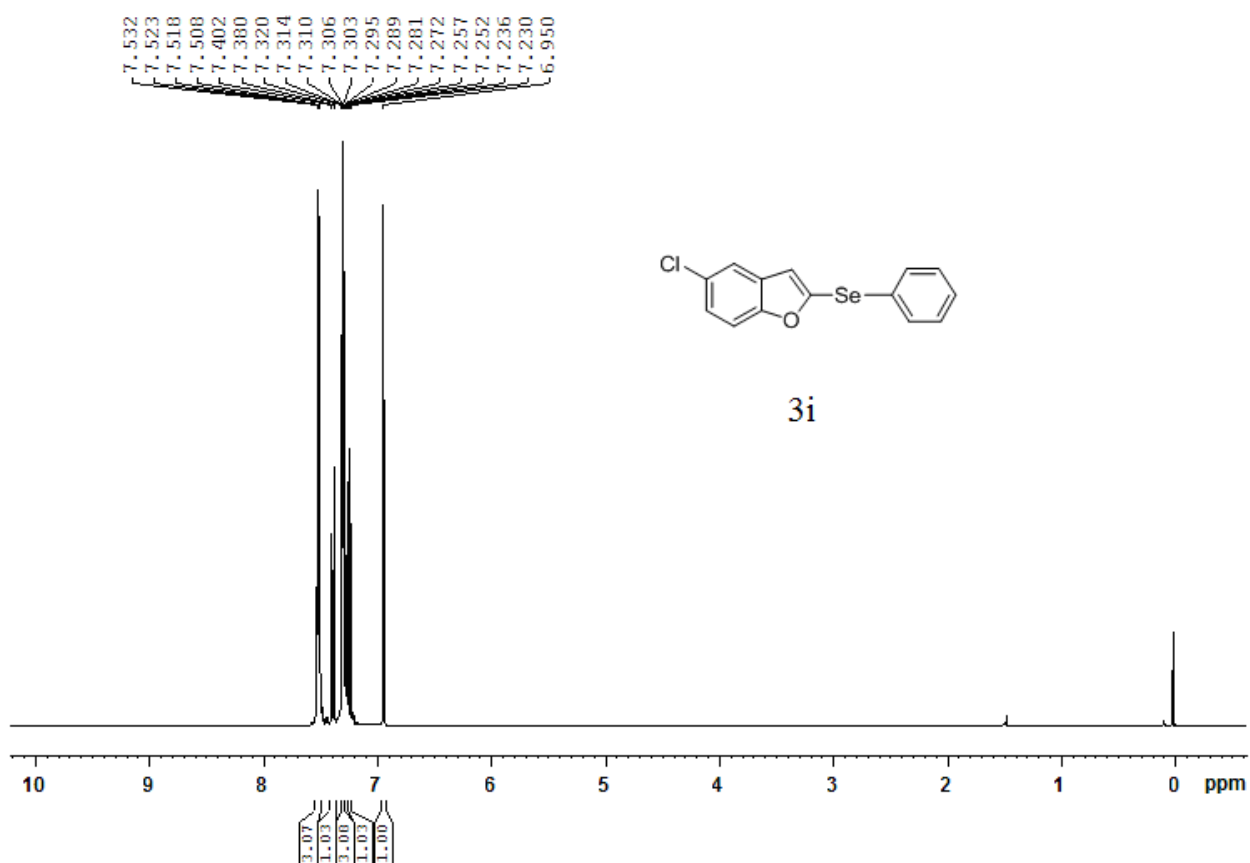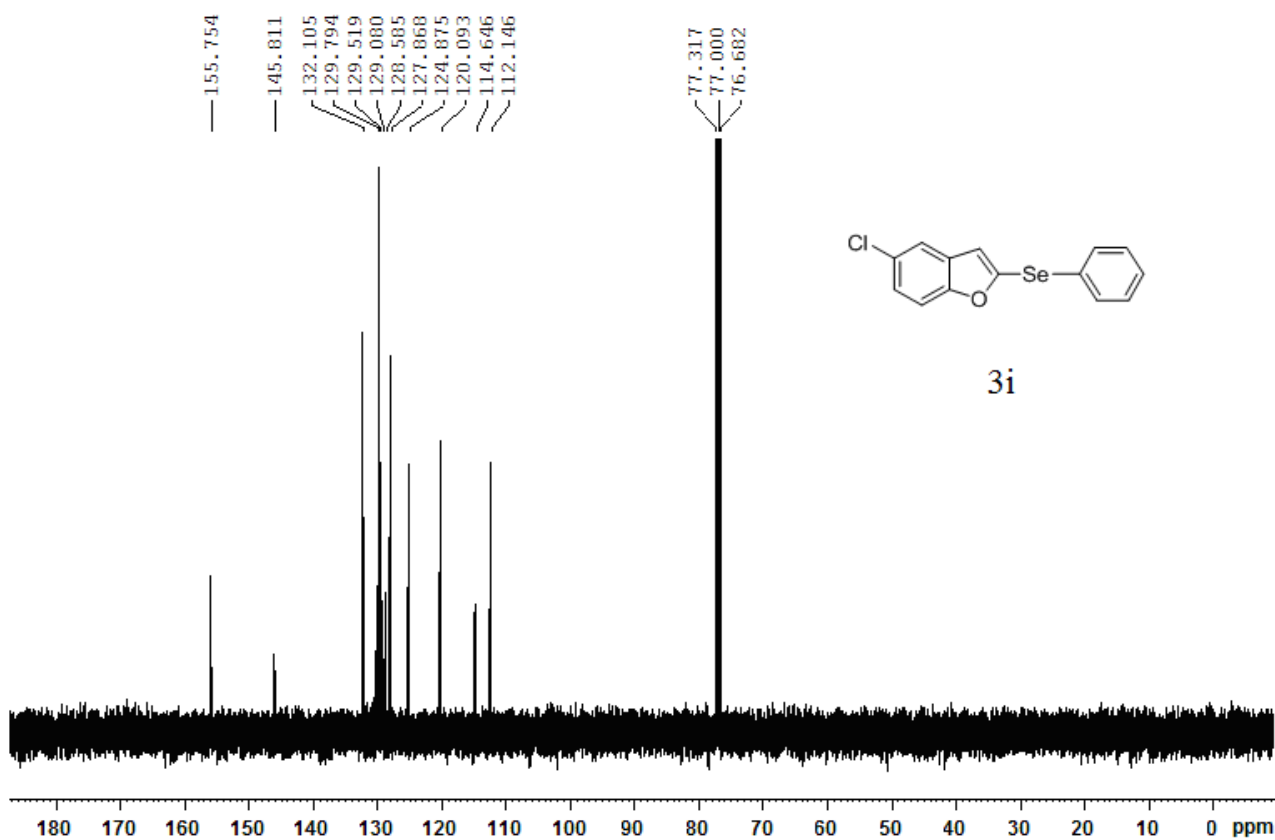



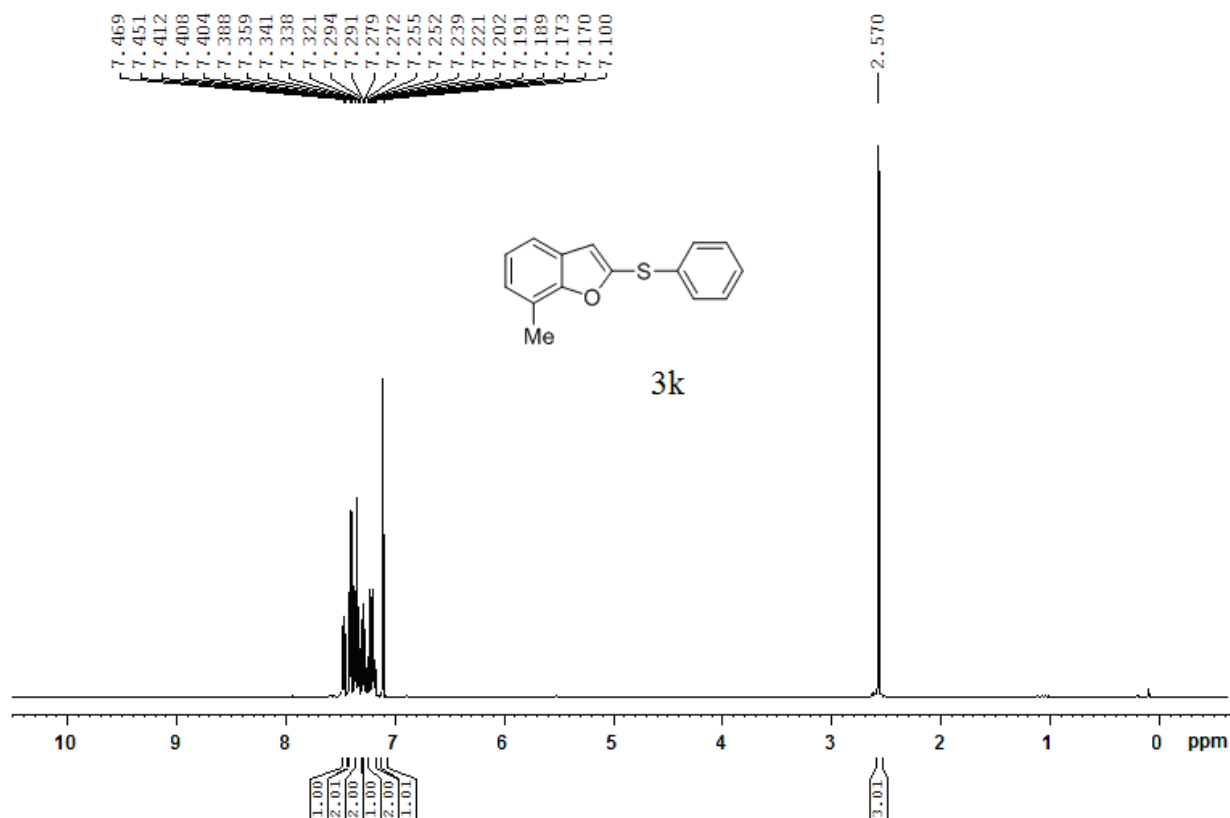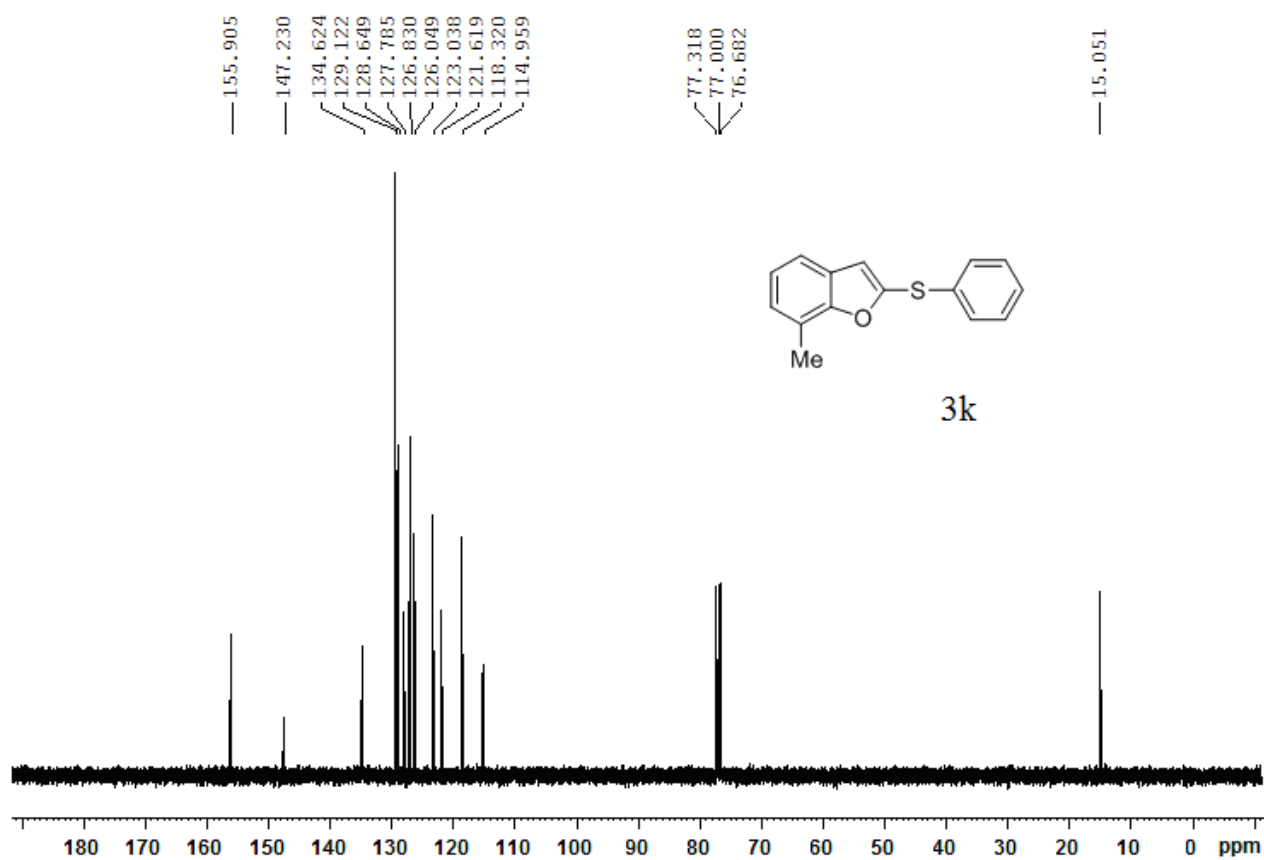

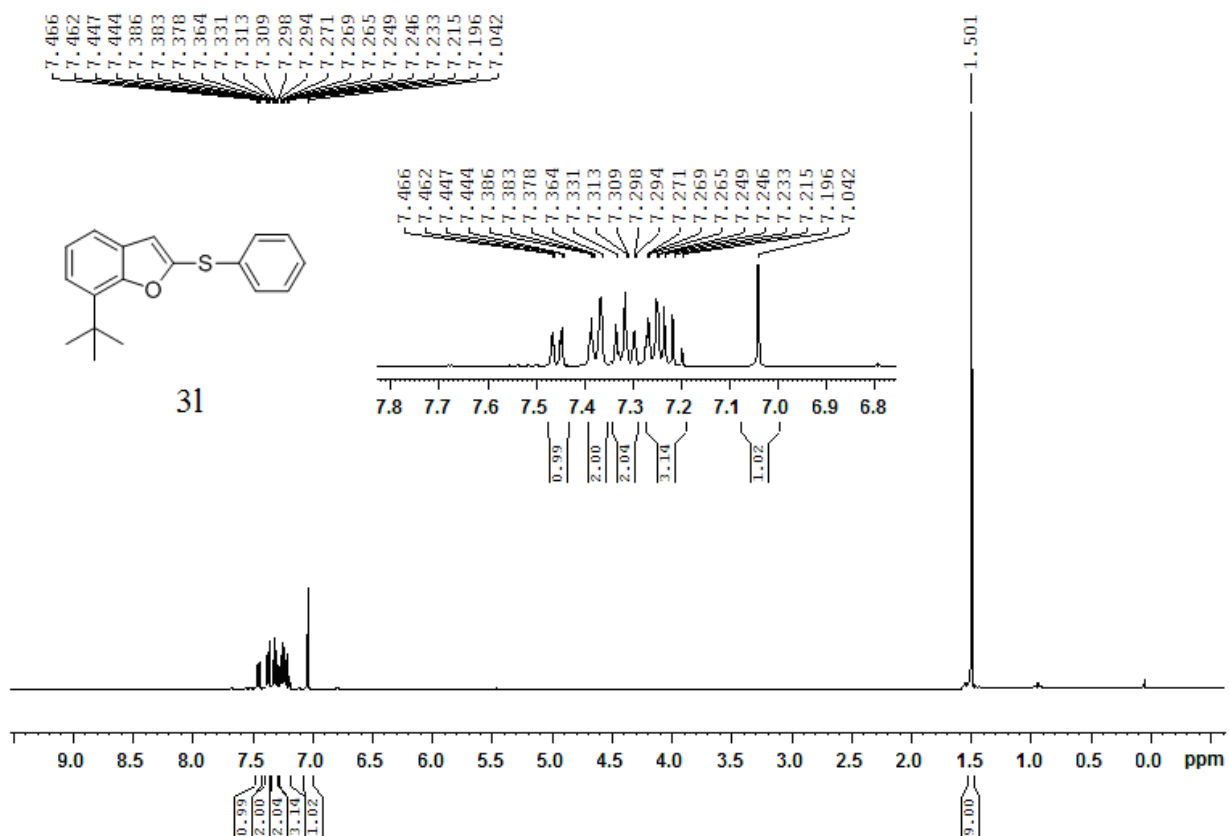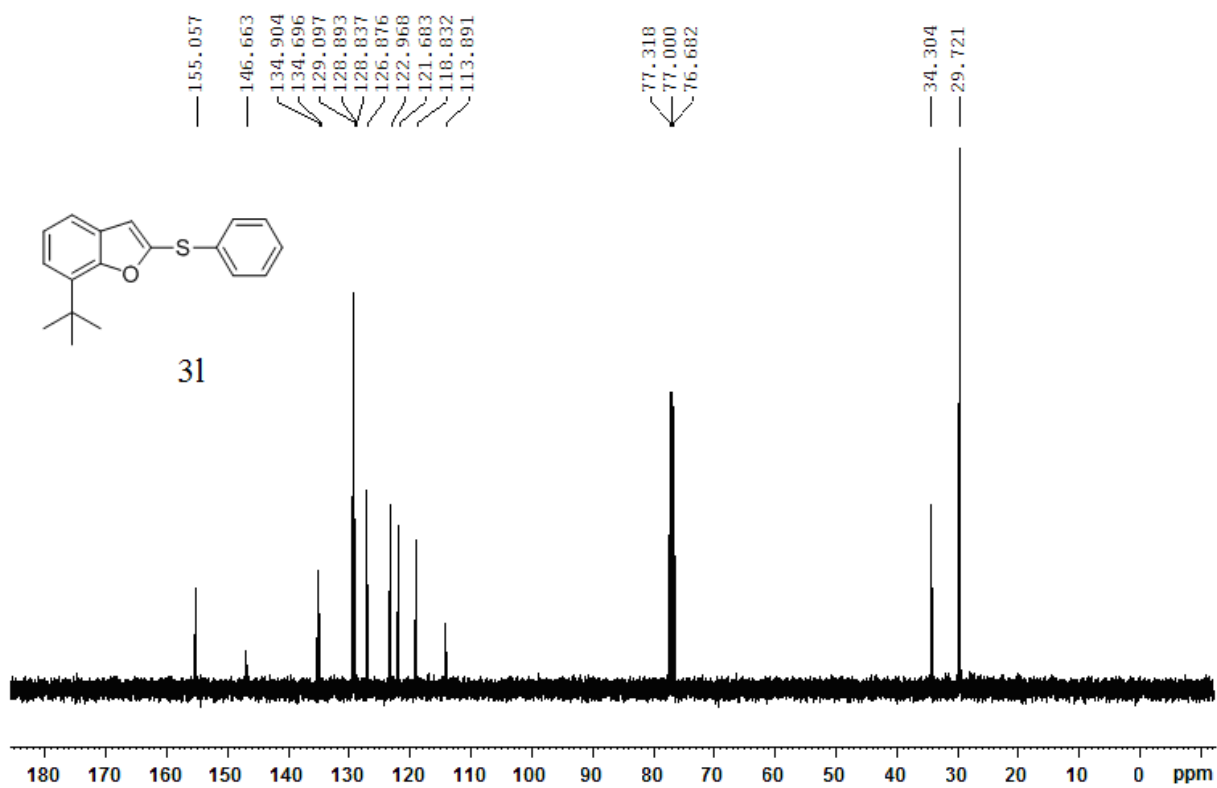

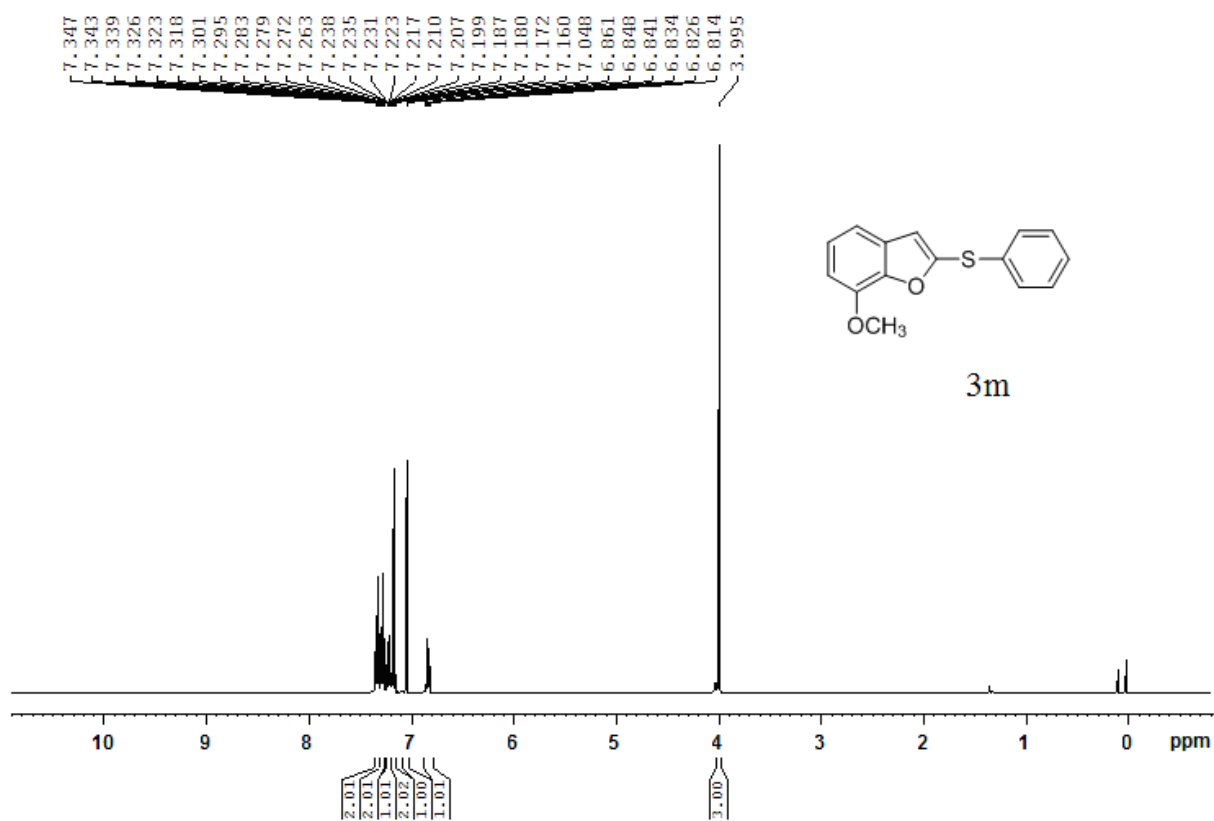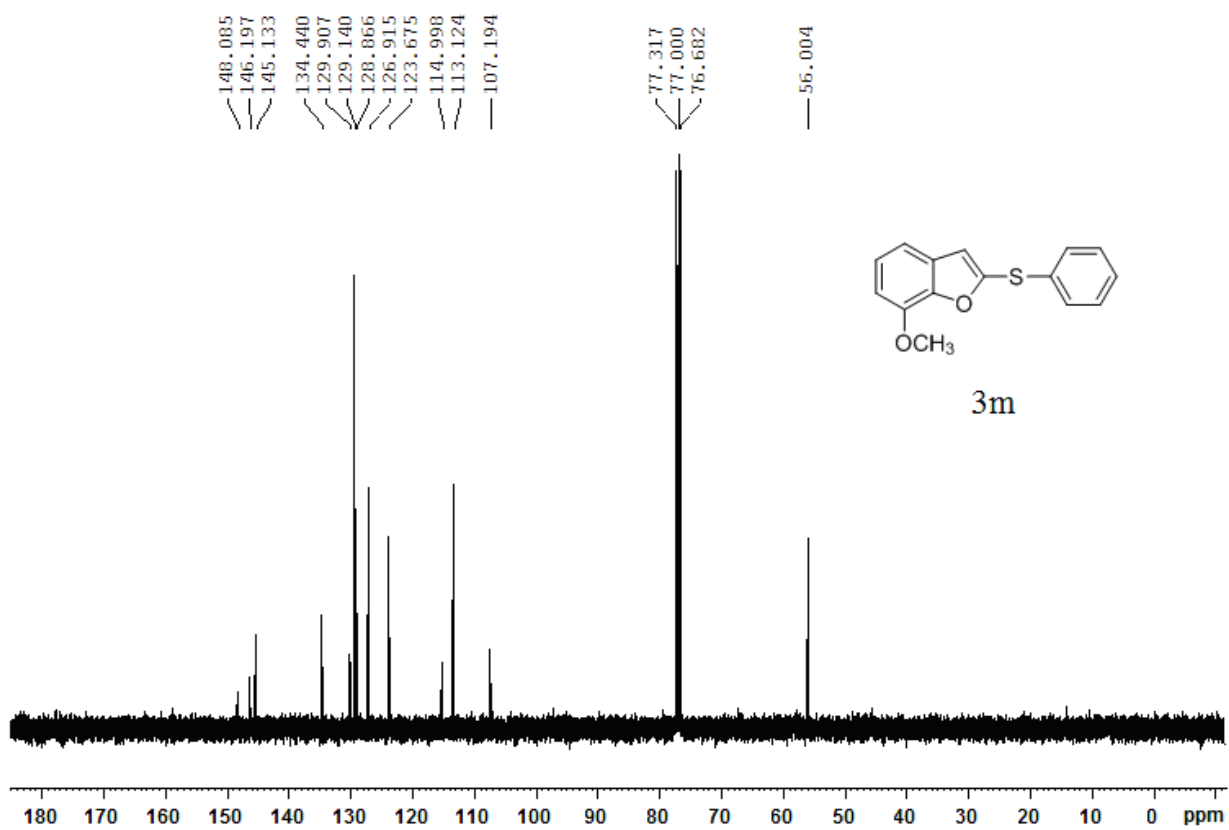



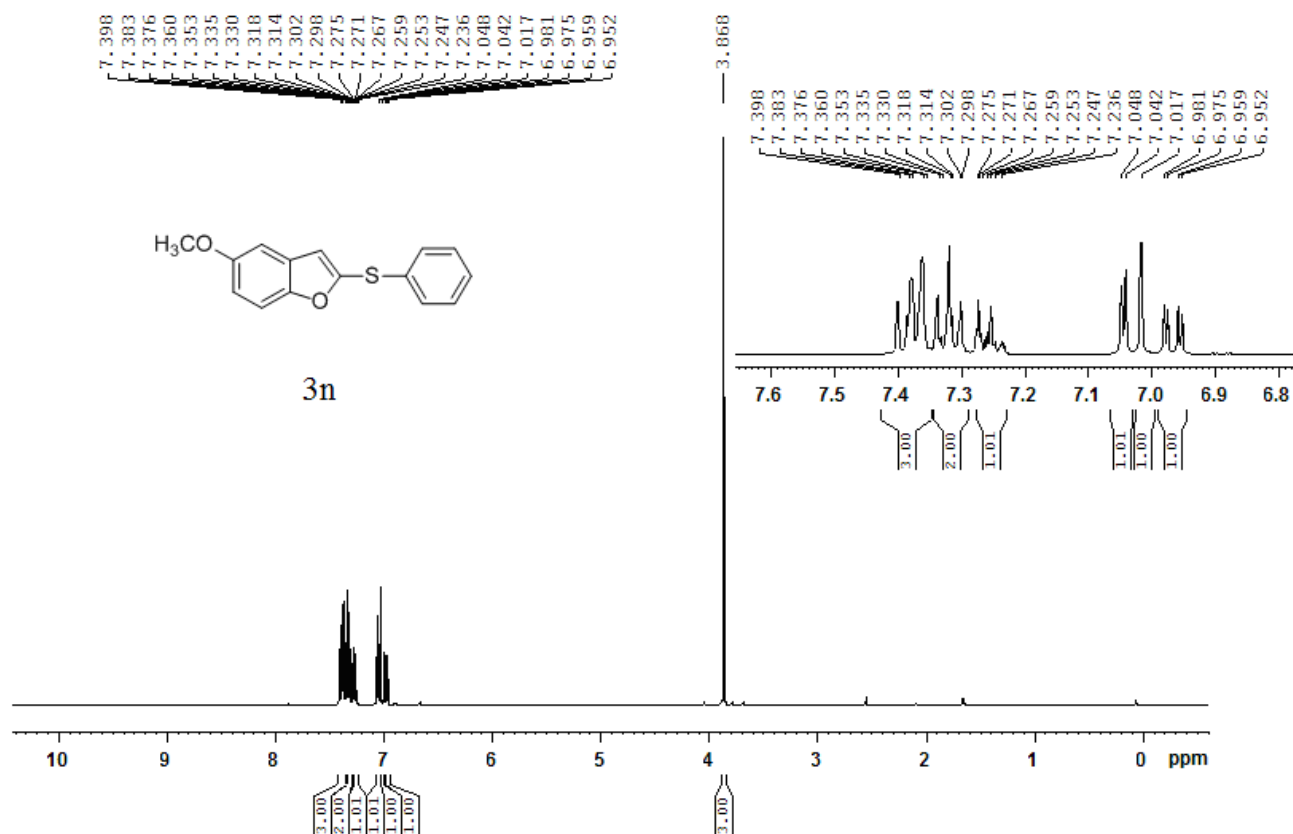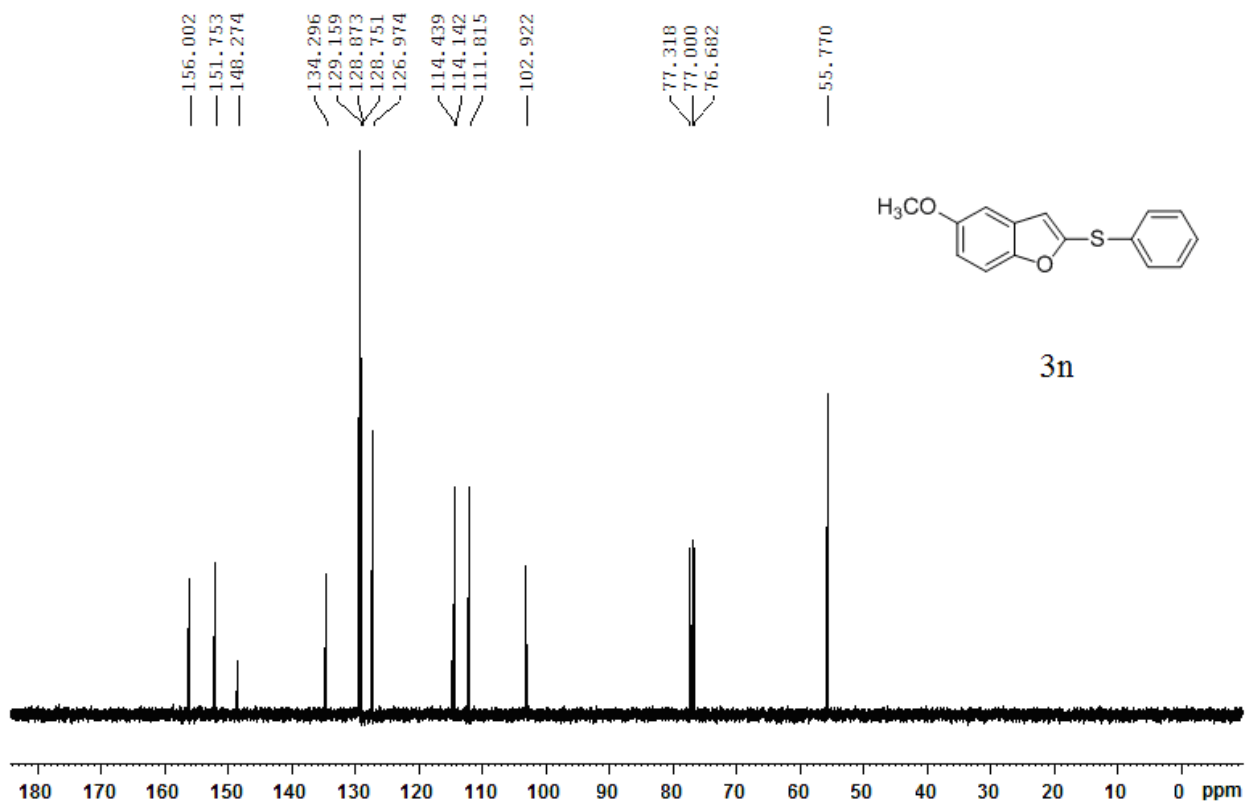

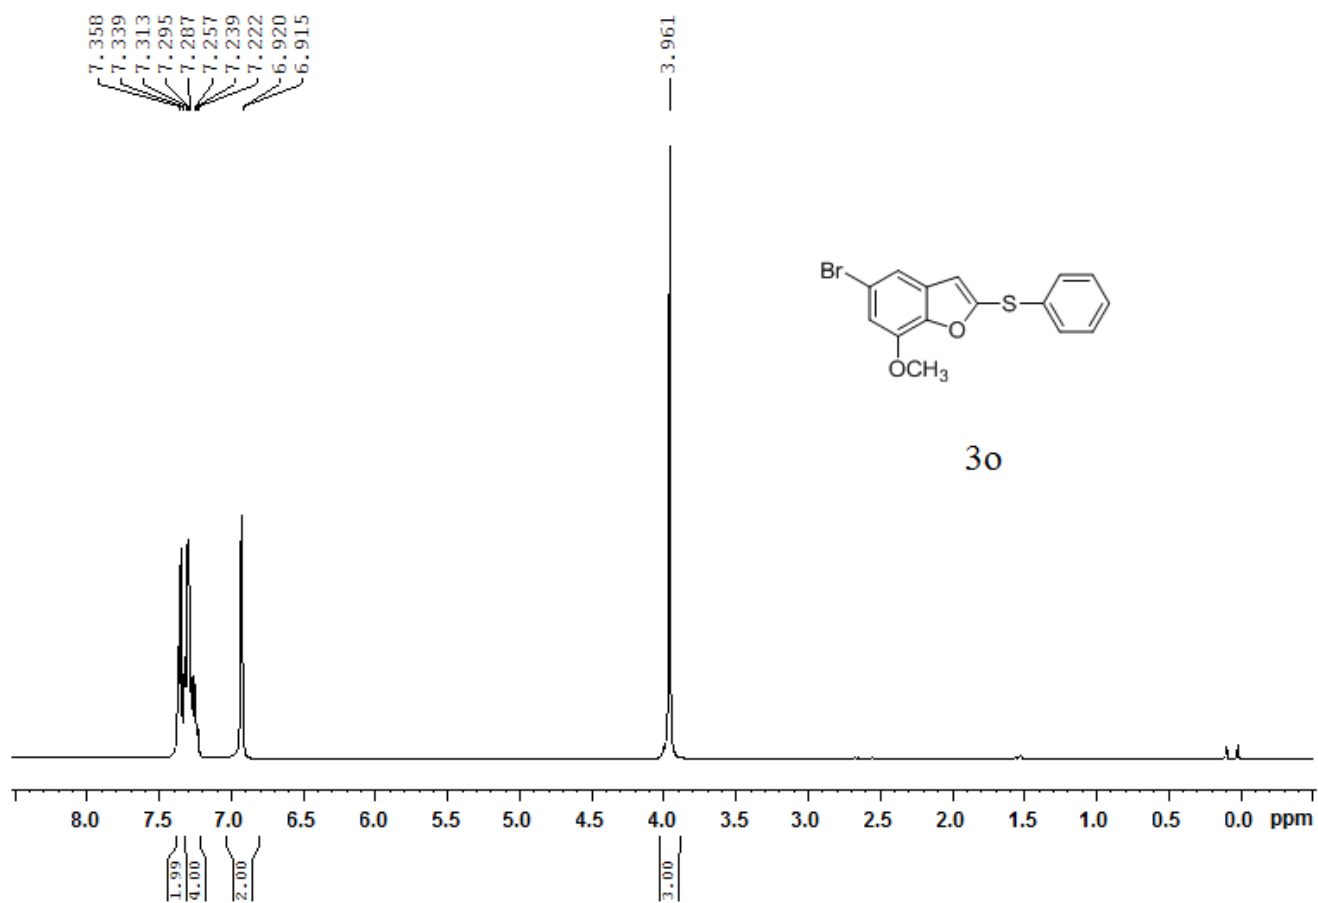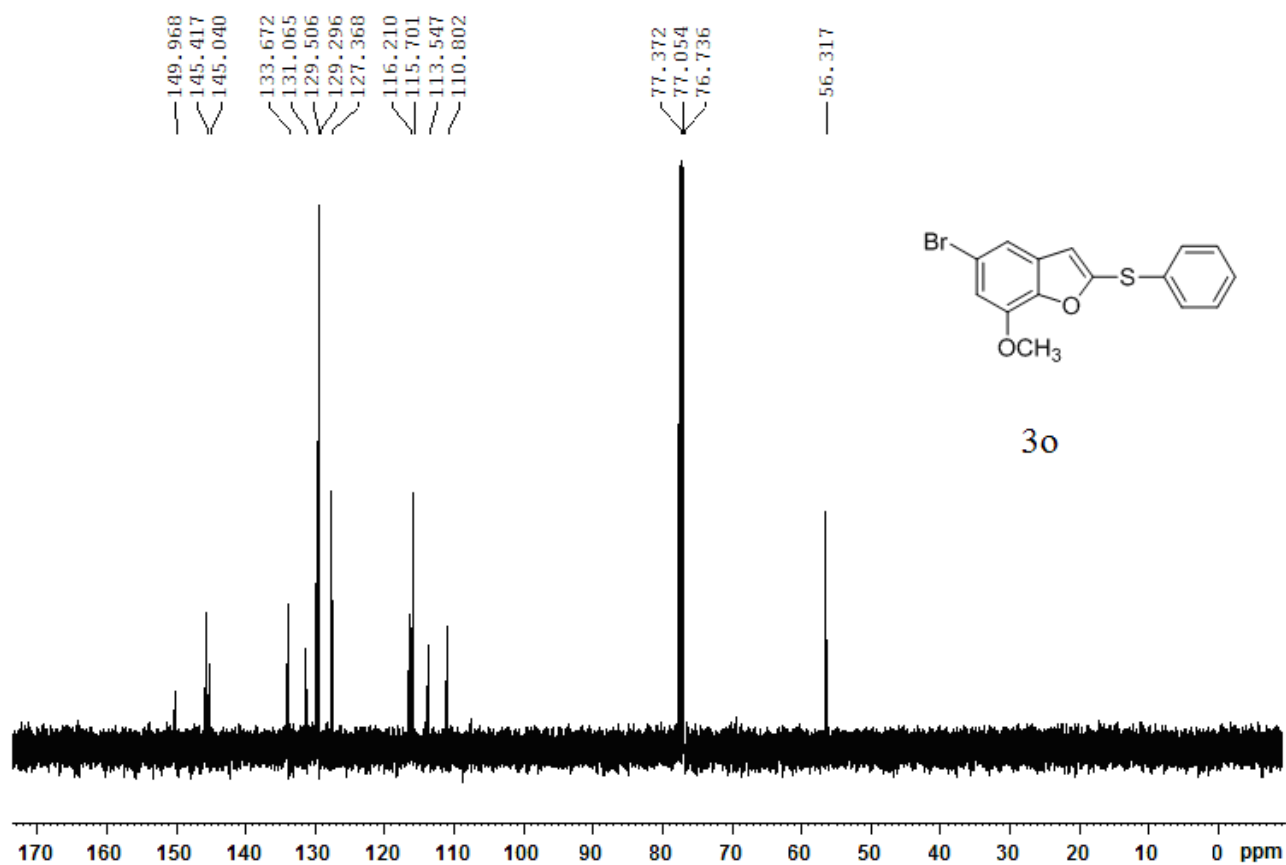

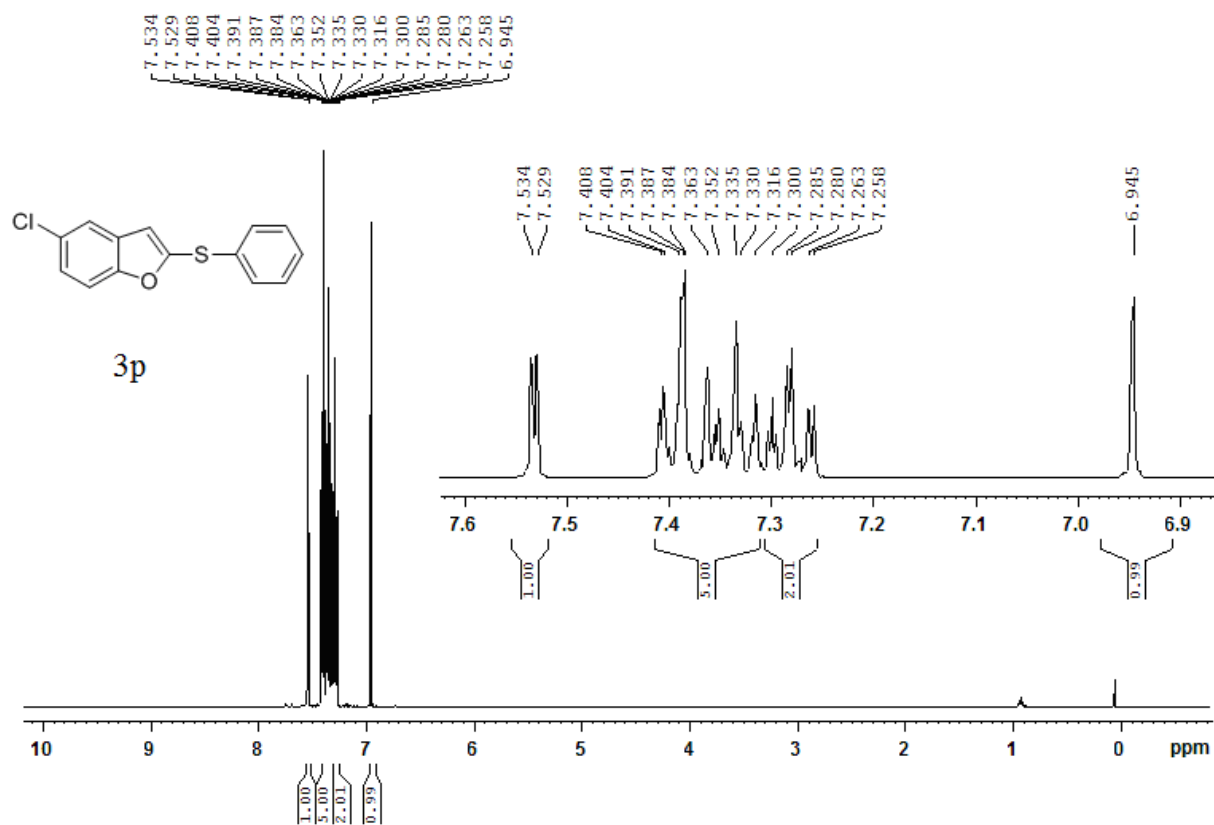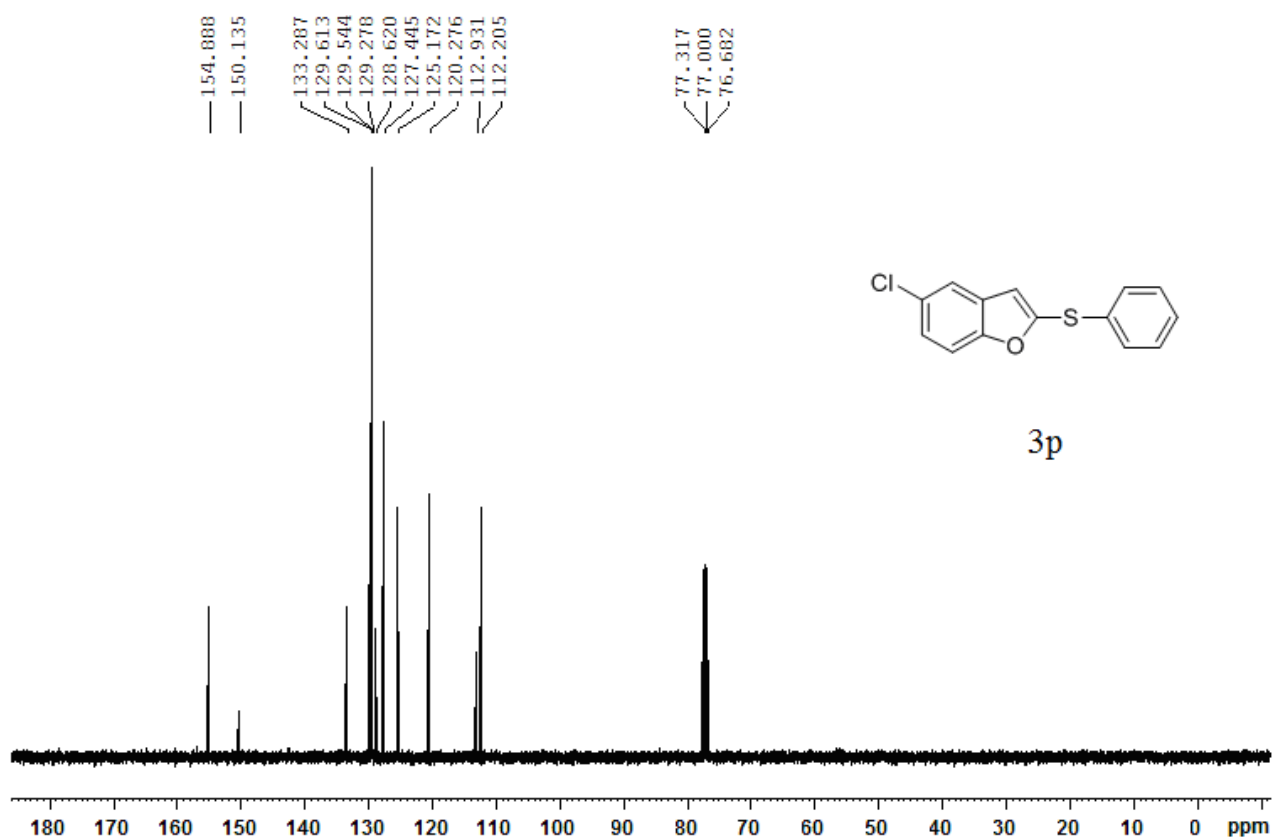

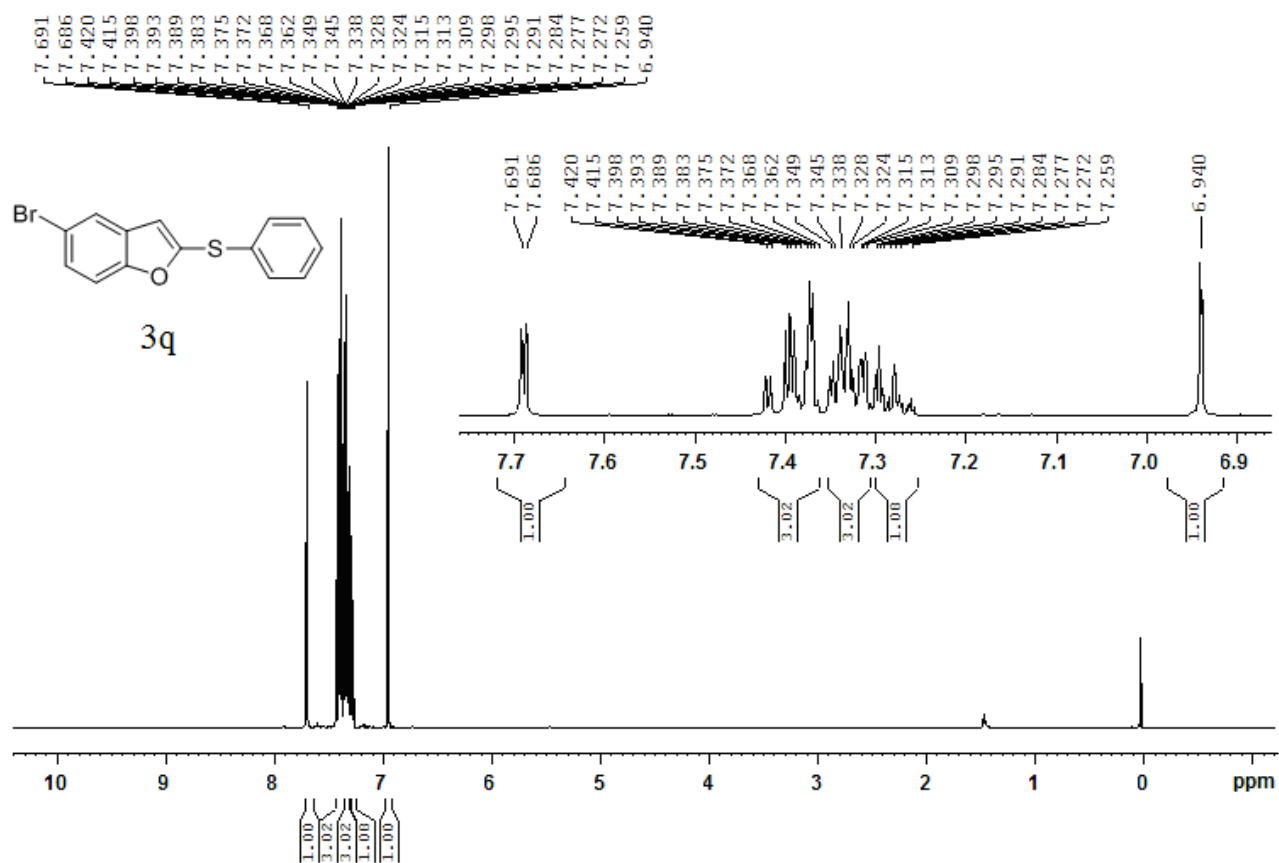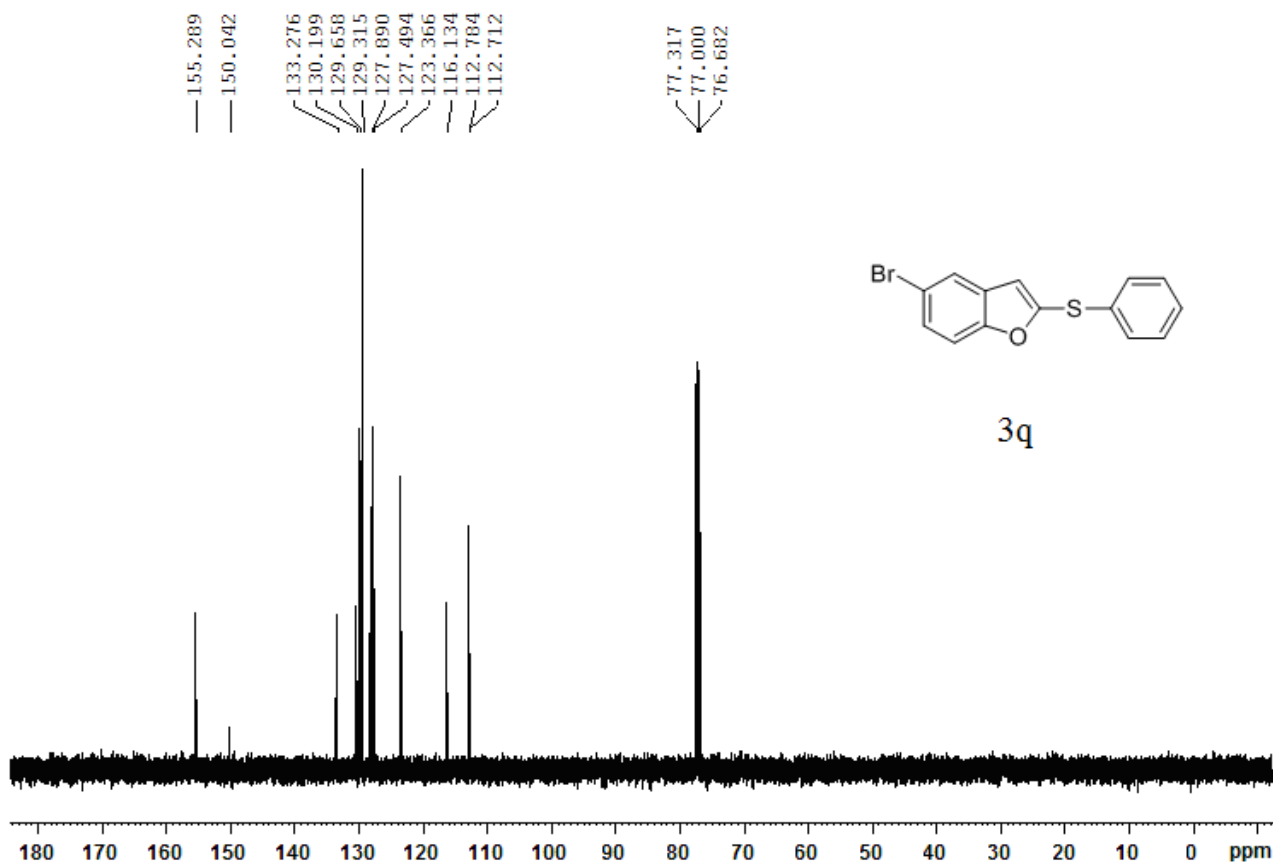

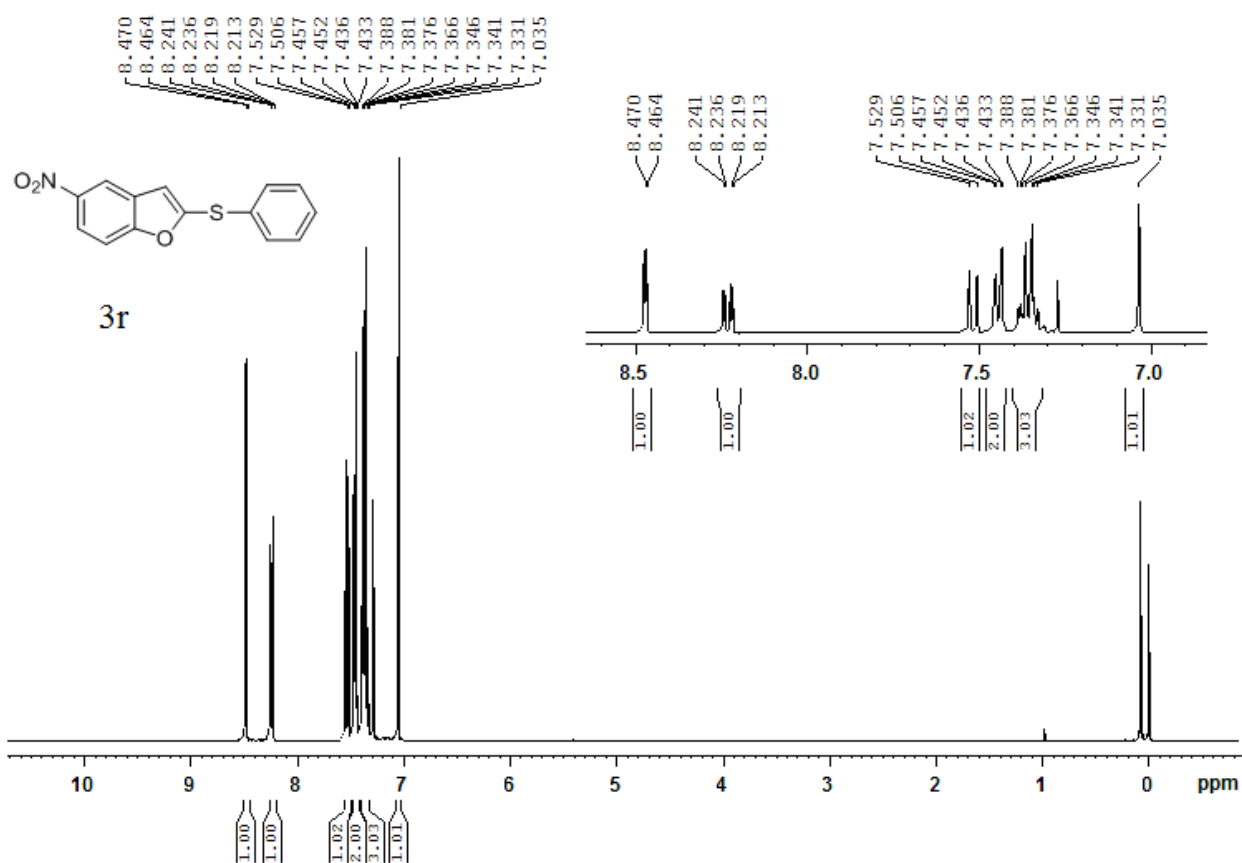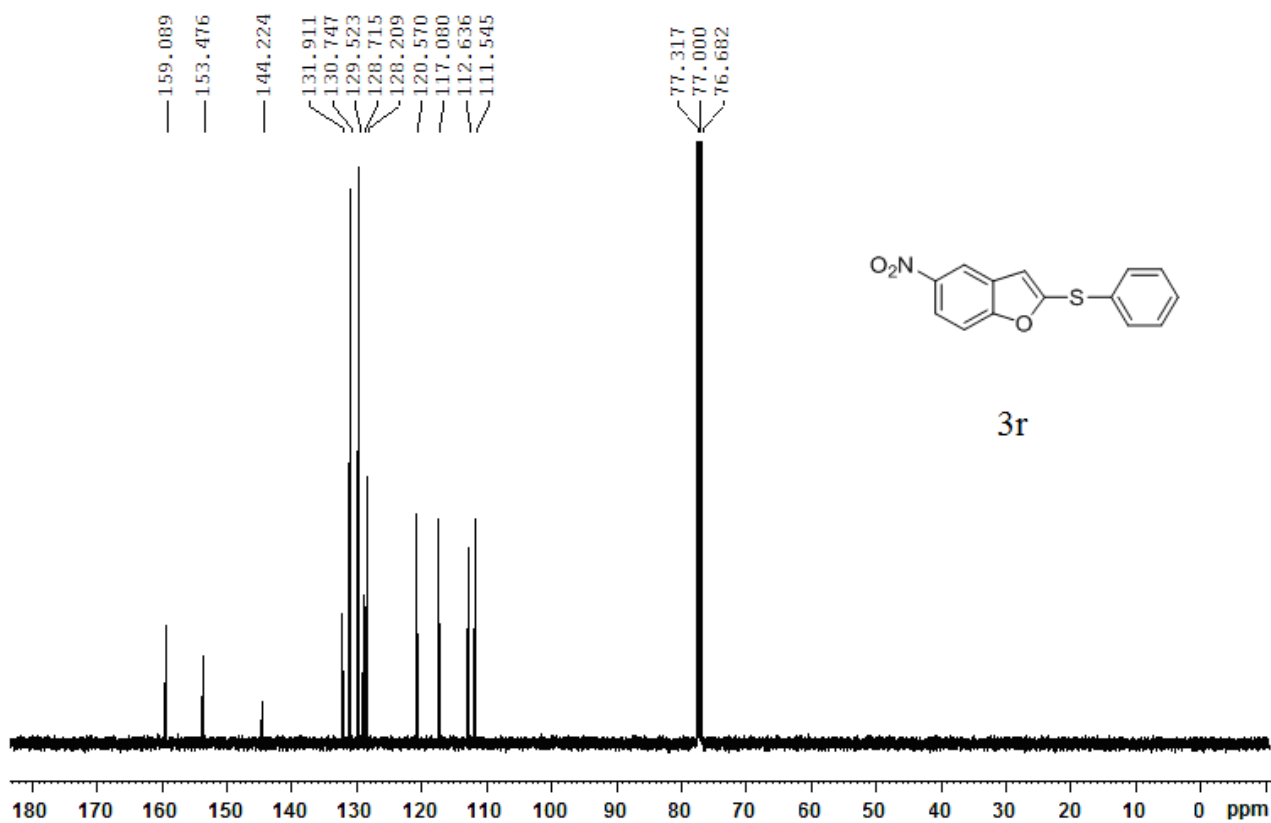

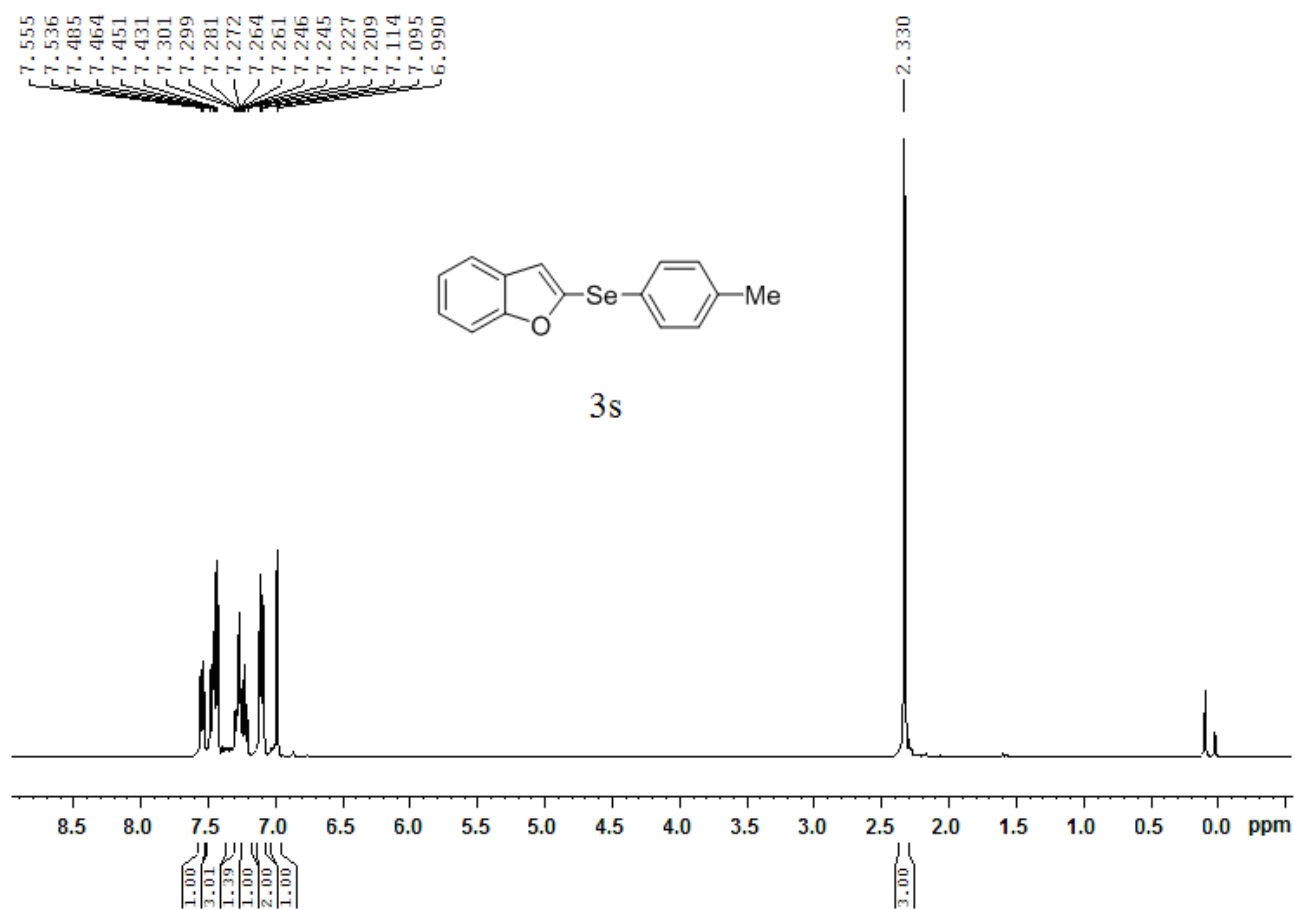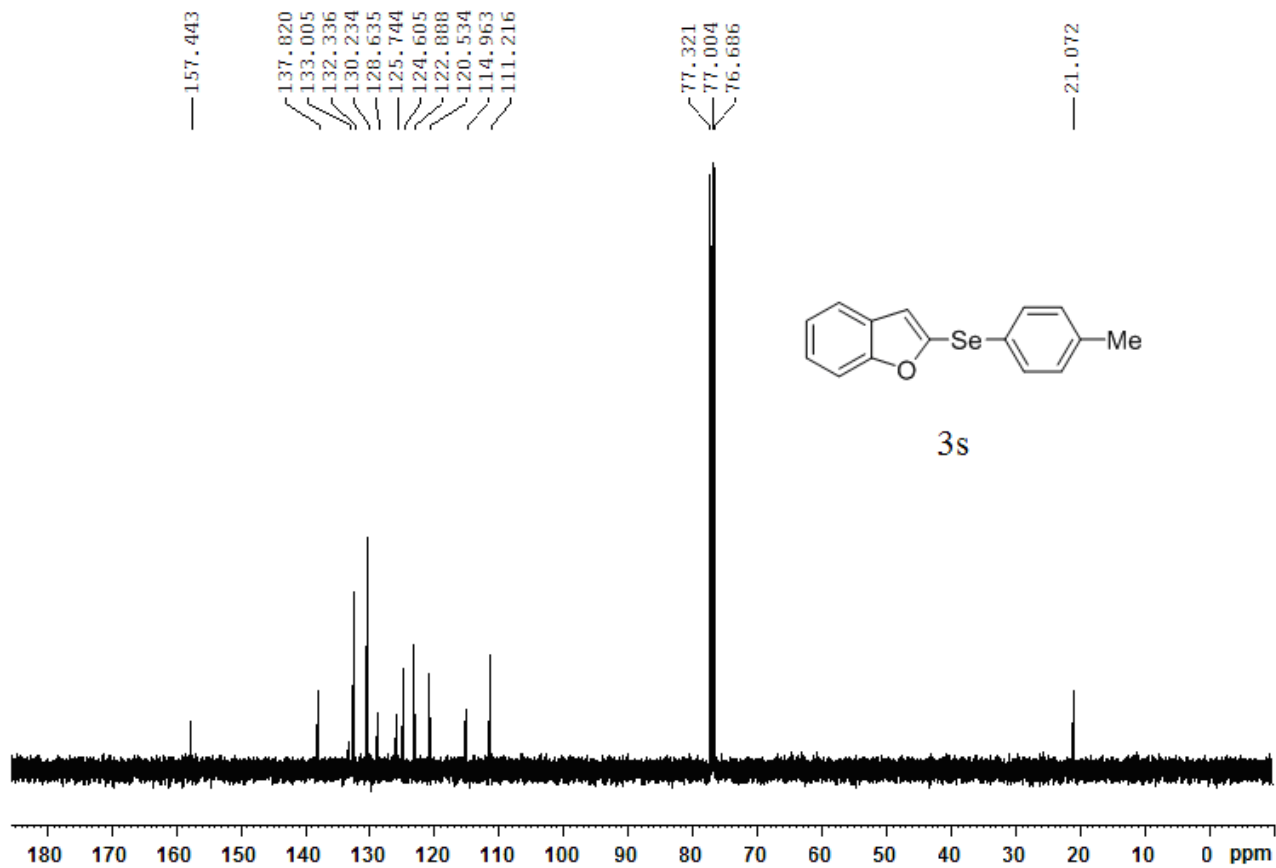

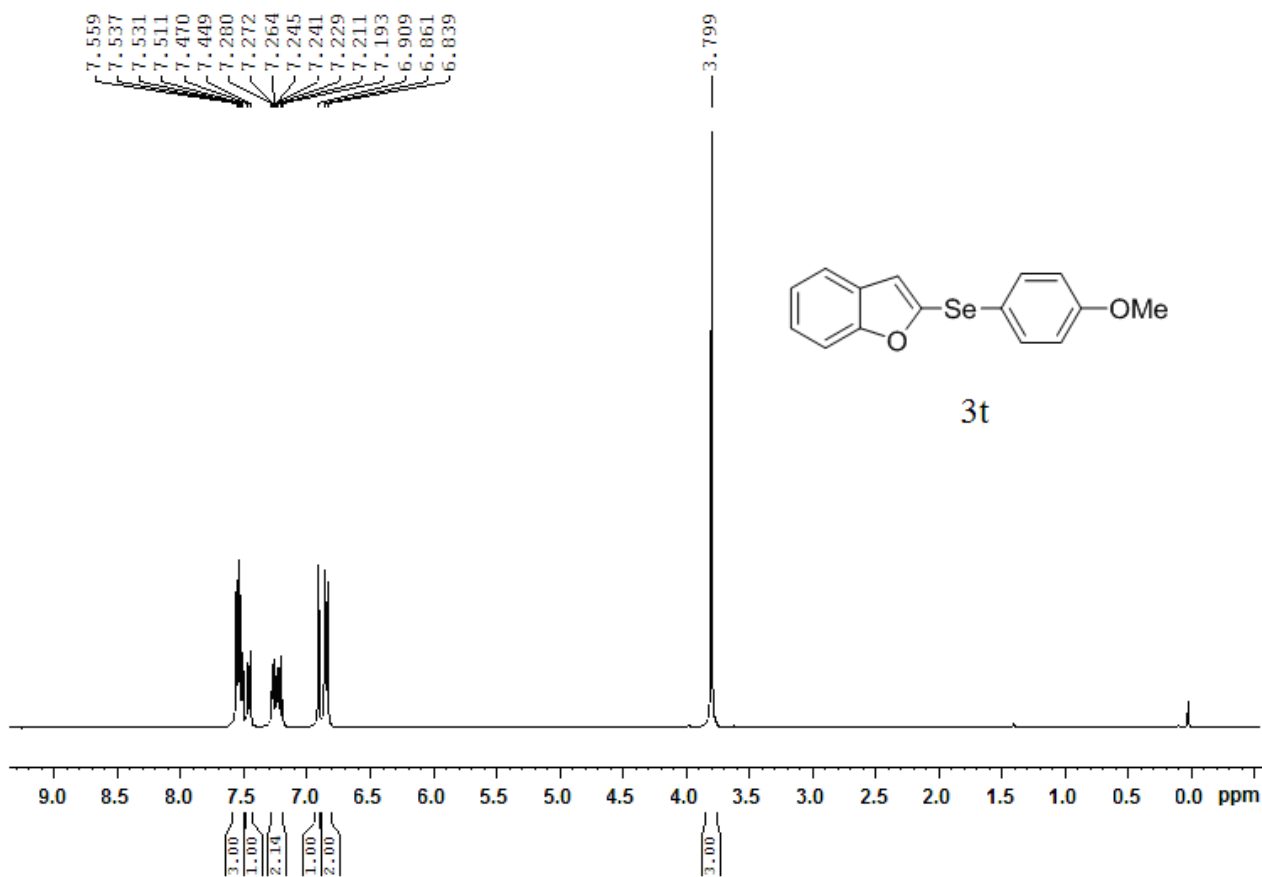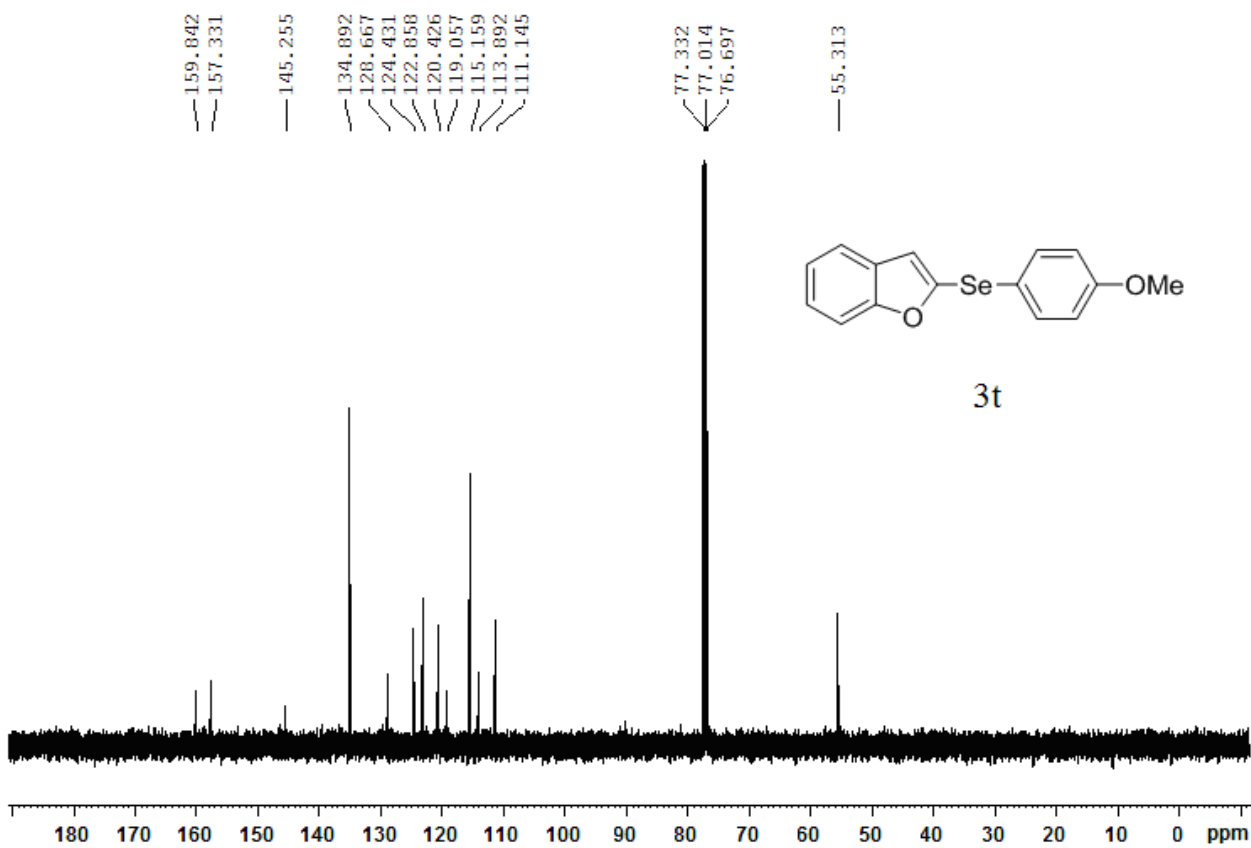

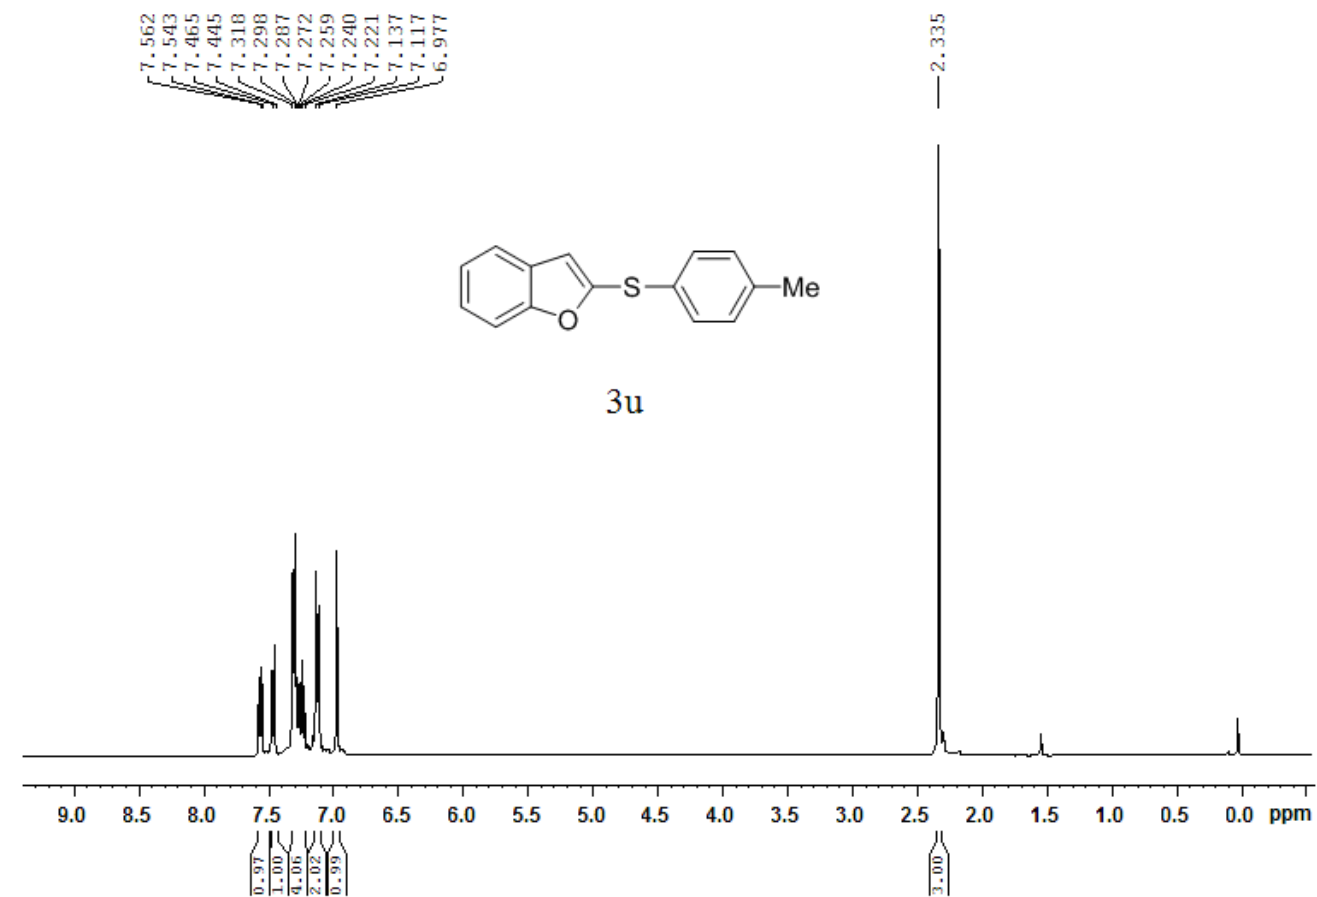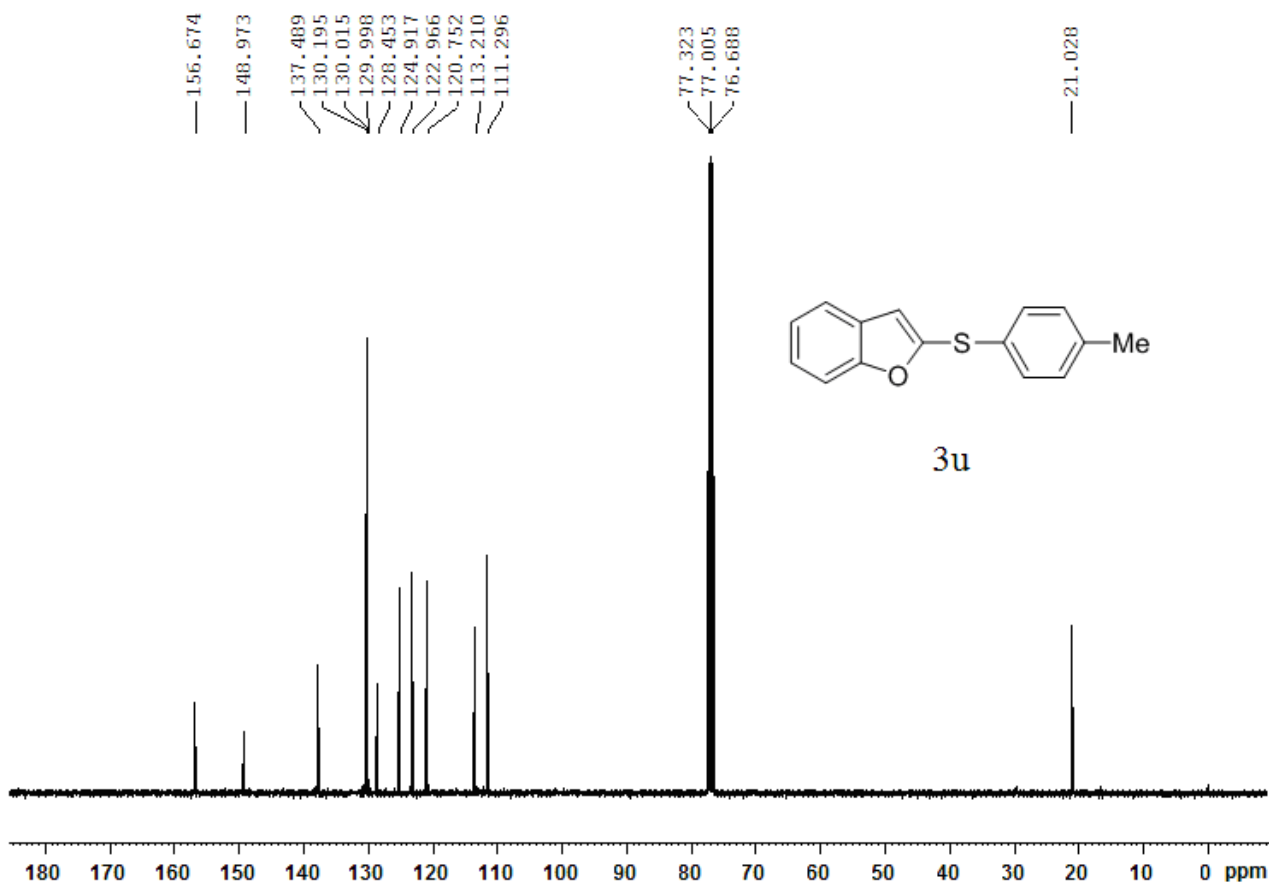



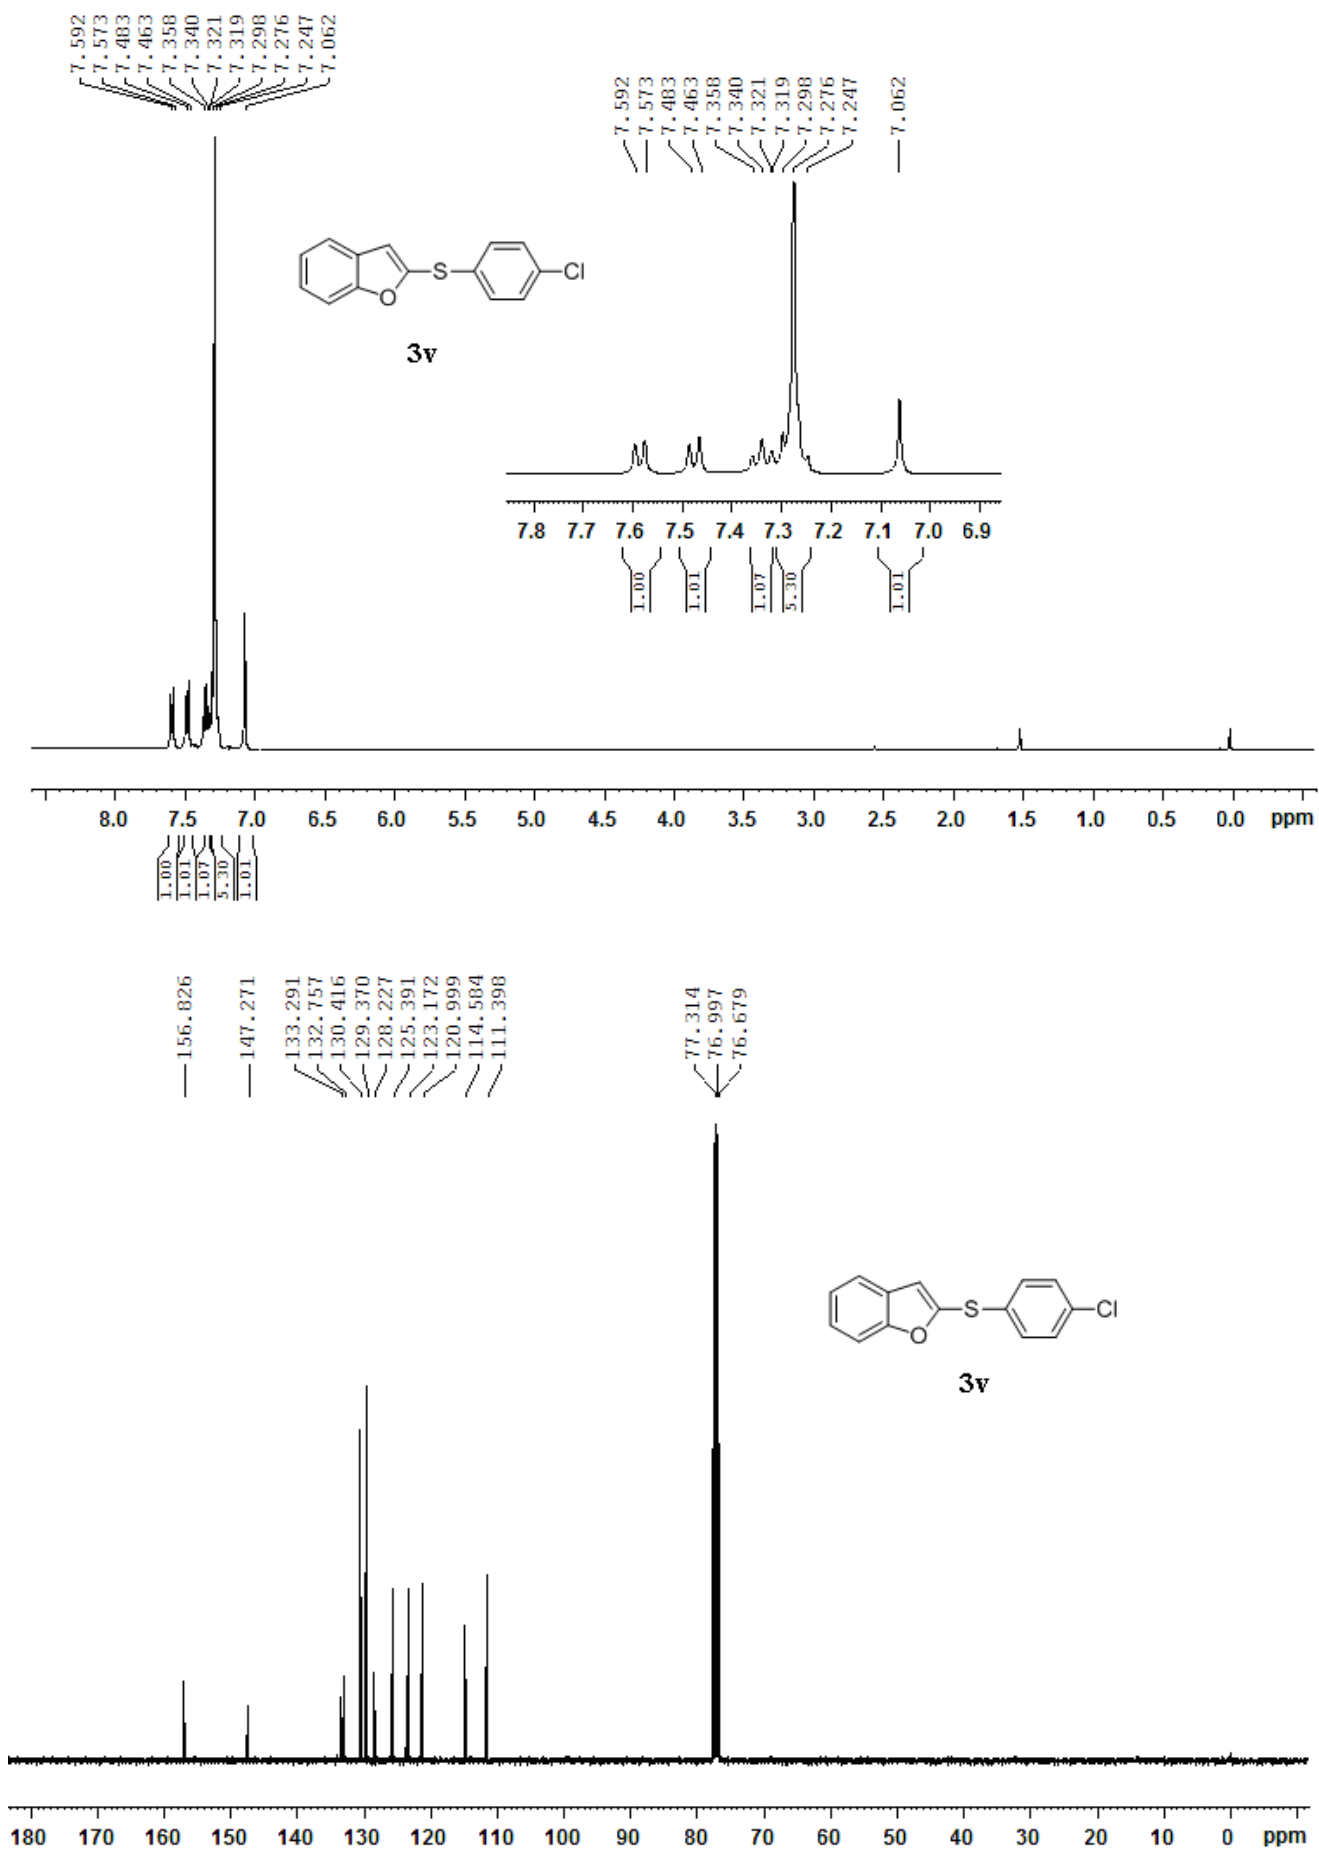

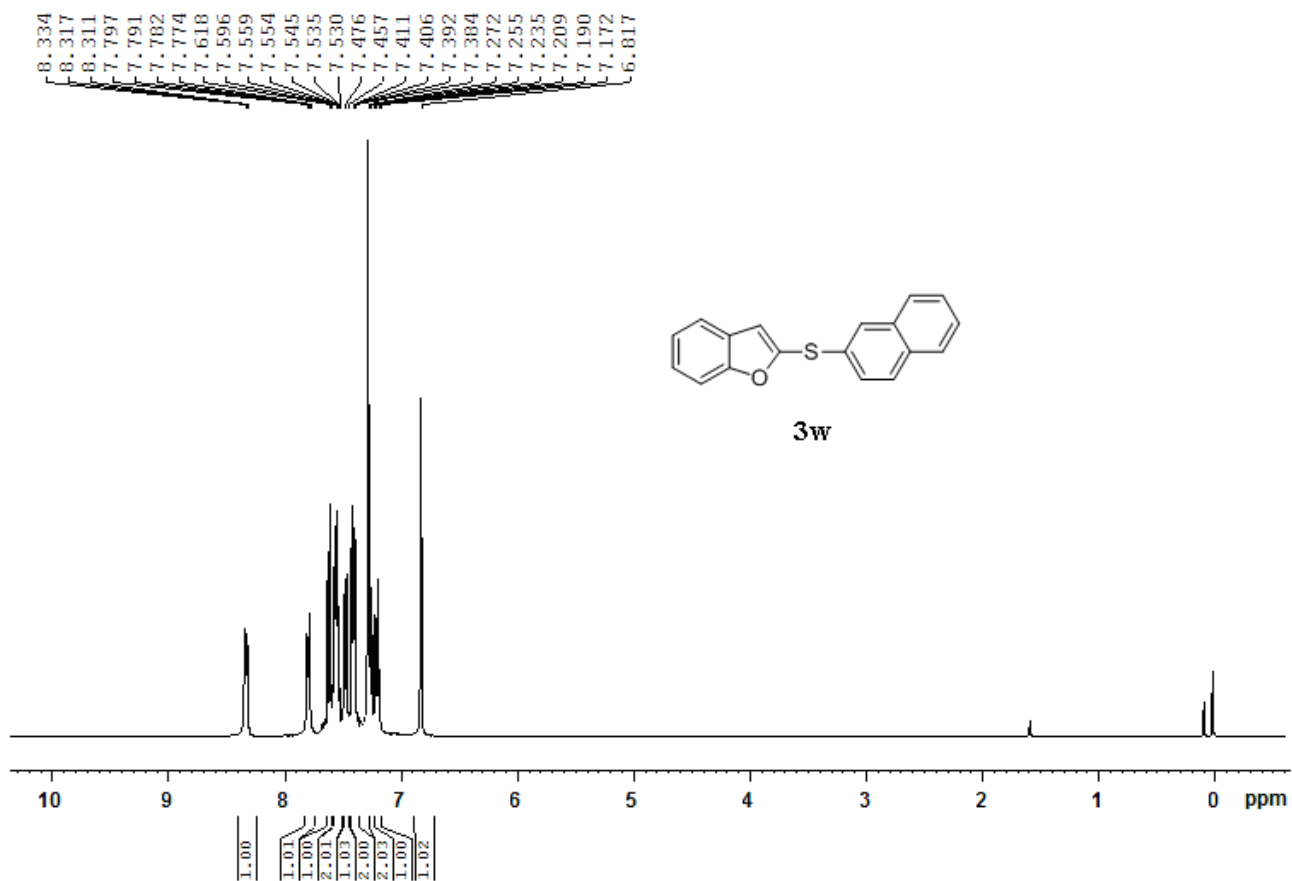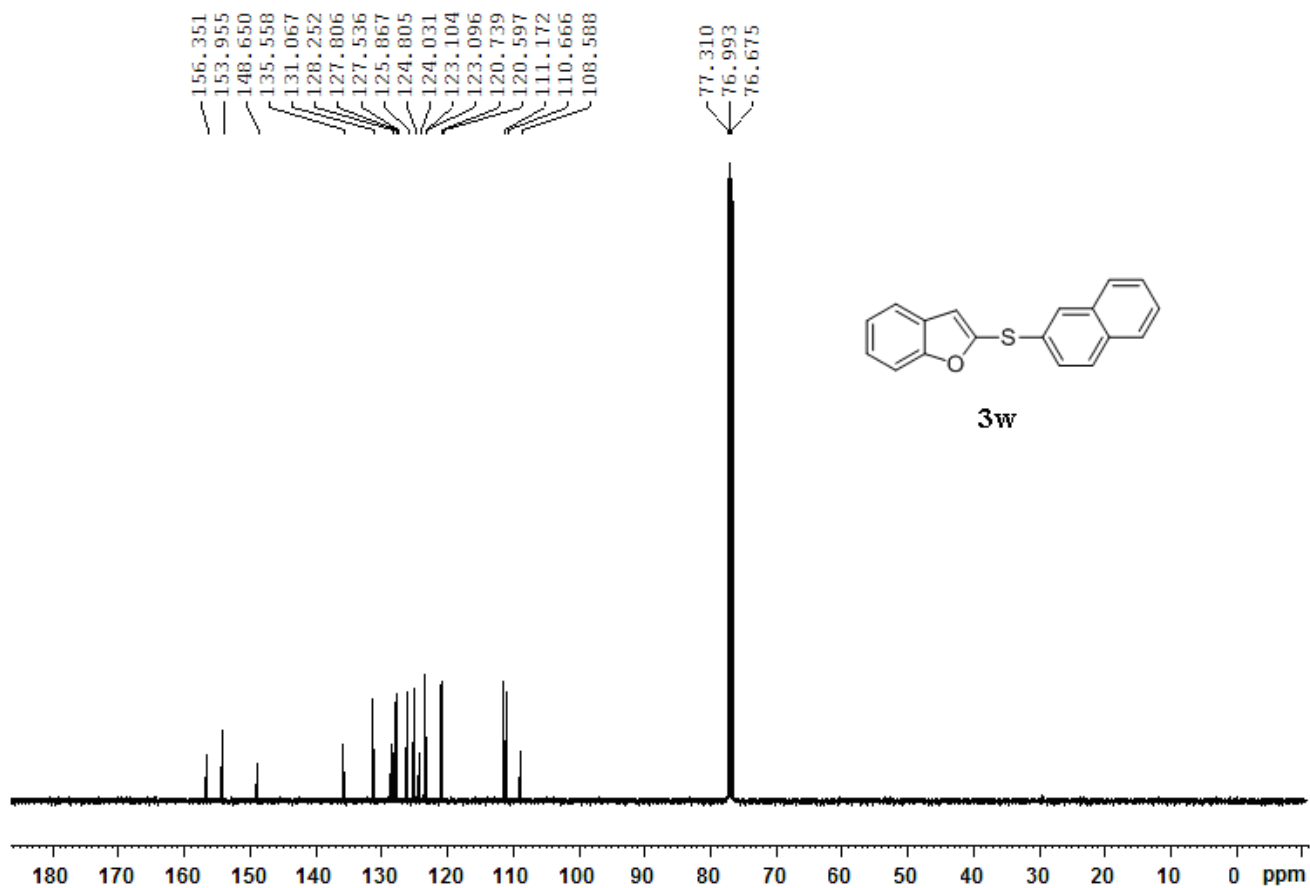

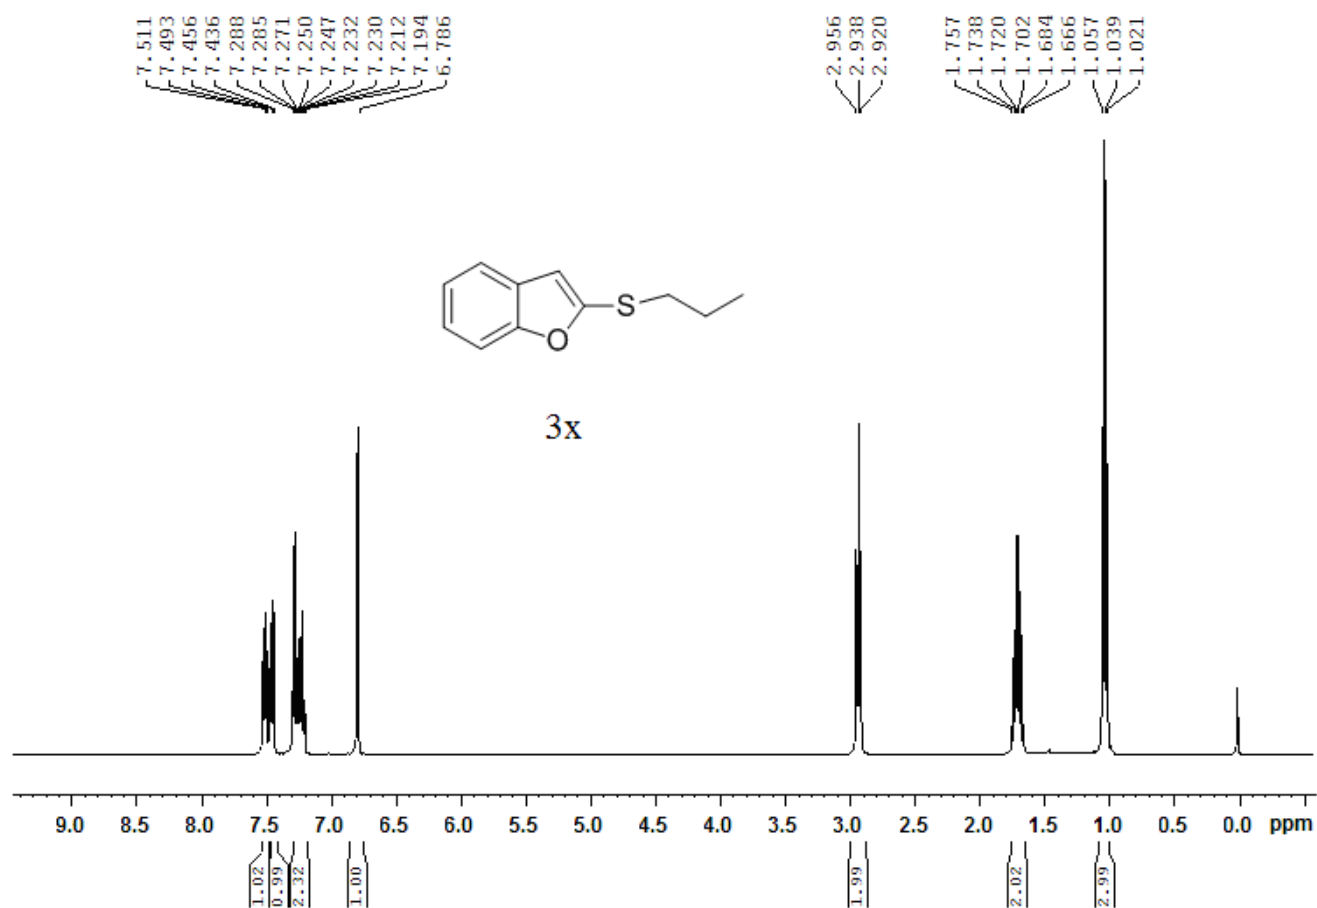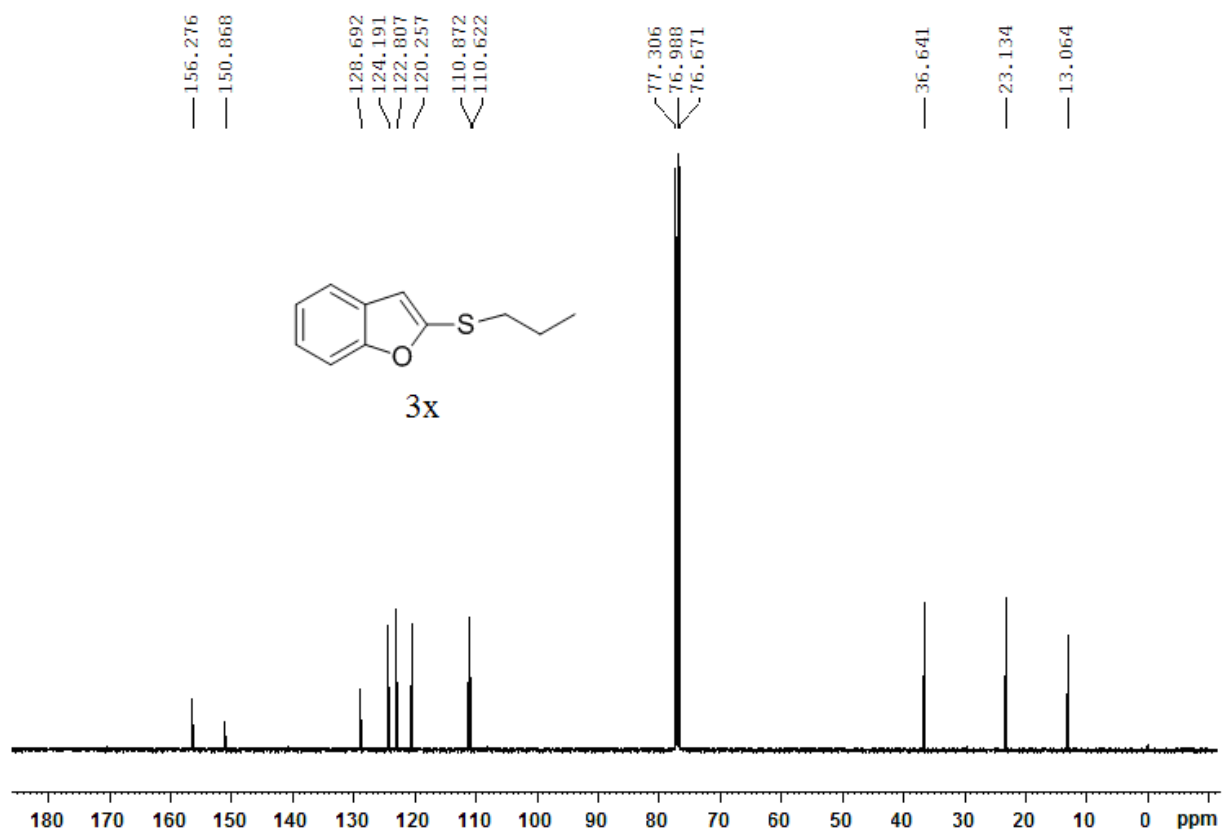

Shanghai Mass Spectrometry Center  
 Shanghai Institute of Organic Chemistry  
 Chinese Academic of Sciences  
 High Resolution MS Data Report

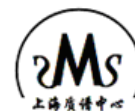

Instrument: Waters Micromass GCT Premier Ionisation Mode: EI+ Electron Energy: 70eV  
 Card Serial Number: GCT-P-T11-03-OS0269

Sample Serial Number: HBSF-M35-S01

Operator: Li

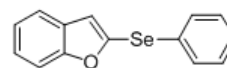

3a

Date: 2011/04/01

Elemental Composition Report

Single Mass Analysis

Tolerance = 1.5 mDa / DBE: min = -1.5, max = 50.0

Element prediction: Off

Monoisotopic Mass, Odd and Even Electron Ions

306 formula(e) evaluated with 4 results within limits (all results (up to 1000) for each mass)

Elements Used:

C: 0-20 H: 0-80 N: 0-4 O: 0-4 F: 0-1 Se: 0-1

Minimum:

Maximum: 1.5 5.0 -1.5 50.0

| Mass     | Calc. Mass | mDa  | PPM  | DBE  | i-FIT | Formula         |
|----------|------------|------|------|------|-------|-----------------|
| 273.9900 | 273.9897   | 0.3  | 1.1  | 11.0 | 2.6   | C14 H10 O Se    |
|          | 273.9895   | 0.5  | 1.8  | 7.5  | 32.3  | C9 H9 N3 O F Se |
|          | 273.9908   | -0.8 | -2.9 | 7.0  | 16.9  | C11 H11 O2 F Se |
|          | 273.9889   | 1.1  | 4.0  | 16.5 | 475.8 | C14 N3 O4       |

Shanghai Mass Spectrometry Center  
 Shanghai Institute of Organic Chemistry  
 Chinese Academic of Sciences  
 High Resolution MS Data Report

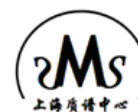

Instrument: Waters Micromass GCT Ionisation Mode: EI+ Electron Energy: 70eV

Card Serial Number: GCT-T11-11-OS0832

Sample Serial Number: HBSF-LiN9-213

Operator: Li

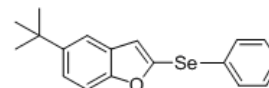

3b

Date: 2011/11/02

Elemental Composition Report

Single Mass Analysis

Tolerance = 5.0 PPM / DBE: min = -1.5, max = 50.0

Isotope cluster parameters: Separation = 1.0 Abundance = 1.0%

Monoisotopic Mass, Odd and Even Electron Ions

387 formula(e) evaluated with 5 results within limits (all results (up to 1000) for each mass)

Minimum:

Maximum: 2.0 5.0 -1.5 50.0

| Mass     | Calc. Mass | mDa  | PPM  | DBE  | Score | Formula             |
|----------|------------|------|------|------|-------|---------------------|
| 324.0579 | 324.0582   | -0.3 | -0.8 | 12.0 | 2     | C19 H18 78Se        |
|          | 324.0582   | -0.3 | -1.1 | 11.0 | 1     | C18 H18 O 74Se      |
|          | 324.0575   | 0.4  | 1.2  | 22.0 | 5     | C25 H8 O            |
|          | 324.0585   | -0.6 | -1.7 | -1.5 | 4     | C10 H29 O 77Se 82Se |
|          | 324.0589   | -1.0 | -3.0 | 1.0  | 3     | C12 H28 74Se 78Se   |

Shanghai Mass Spectrometry Center<sup>†</sup>  
 Shanghai Institute of Organic Chemistry<sup>†</sup>  
 Chinese Academic of Sciences<sup>†</sup>  
 High Resolution MS Data Report

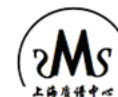

Instrument: Waters Micromass GCT Premier Ionisation Mode: EI+ Electron Energy: 70eV

Card Serial Number: GCT-P-T11-11-OS0848<sup>†</sup>

Sample Serial Number: HBSF-Li-N8-07<sup>†</sup>

Operator: Li<sup>†</sup>

Date: 2011/11/14<sup>†</sup>

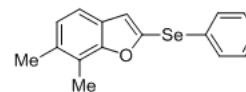

3c

Elemental Composition Report<sup>†</sup>

Single Mass Analysis <sup>†</sup>

Tolerance = 5.0 PPM / DBE: min = -1.5, max = 50.0<sup>†</sup>

Element prediction: Off <sup>†</sup>

Monoisotopic Mass, Odd and Even Electron Ions<sup>†</sup>

898 formula(e) evaluated with 7 results within limits (all results (up to 1000) for each mass)<sup>†</sup>

Elements Used:<sup>†</sup>

C: 0-60 H: 0-80 N: 0-2 O: 0-2 74Se: 0-1 76Se: 0-1 77Se: 0-1 78Se: 0-1 80Se: 0-1 82Se: 0-1 <sup>†</sup>

Minimum: -1.5<sup>†</sup>

Maximum: 2.0 5.0 50.0<sup>†</sup>

| Mass     | Calc. Mass | mDa  | PPM  | DBE  | i-FIT     | Formula <sup>†</sup>            |
|----------|------------|------|------|------|-----------|---------------------------------|
| 296.0271 | 296.0272   | -0.1 | -0.3 | -1.5 | 1332.4... | C8 H25 O 77Se 82Se <sup>†</sup> |
|          | 296.0269   | 0.2  | 0.7  | 11.0 | 22.7...   | C16 H14 O 74Se <sup>†</sup>     |
|          | 296.0269   | 0.2  | 0.7  | 12.0 | 718.0...  | C17 H14 78Se <sup>†</sup>       |
|          | 296.0273   | -0.2 | -0.7 | 9.0  | 1284.9... | C13 H14 N2 O 82Se <sup>†</sup>  |
|          | 296.0276   | -0.5 | -1.7 | 1.0  | 620.8...  | C10 H24 74Se 78Se <sup>†</sup>  |

Shanghai Mass Spectrometry Center<sup>†</sup>  
 Shanghai Institute of Organic Chemistry<sup>†</sup>  
 Chinese Academic of Sciences<sup>†</sup>  
 High Resolution MS Data Report

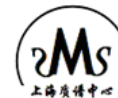

Instrument: Waters Micromass GCT Premier Ionisation Mode: EI+ Electron Energy: 70eV

Card Serial Number: GCT-P-T11-11-OS0849<sup>†</sup>

Sample Serial Number: HBSF-Li-N8-08<sup>†</sup>

Operator: Li<sup>†</sup>

Date: 2011/11/14<sup>†</sup>

Elemental Composition Report<sup>†</sup>

Single Mass Analysis <sup>†</sup>

Tolerance = 5.0 PPM / DBE: min = -1.5, max = 50.0<sup>†</sup>

Element prediction: Off <sup>†</sup>

Monoisotopic Mass, Odd and Even Electron Ions<sup>†</sup>

870 formula(e) evaluated with 8 results within limits (all results (up to 1000) for each mass)<sup>†</sup>

Elements Used:<sup>†</sup>

C: 0-60 H: 0-80 N: 0-1 O: 0-2 74Se: 0-1 76Se: 0-1 77Se: 0-1 78Se: 0-1 80Se: 0-1 82Se: 0-1 <sup>†</sup>

Minimum: -1.5<sup>†</sup>

Maximum: 2.0 5.0 50.0<sup>†</sup>

| Mass     | Calc. Mass | mDa  | PPM  | DBE  | i-FIT   | Formula <sup>†</sup>                |
|----------|------------|------|------|------|---------|-------------------------------------|
| 344.0264 | 344.0262   | 0.2  | 0.6  | 26.0 | 91.4... | C27 H4 O <sup>†</sup>               |
|          | 344.0269   | -0.5 | -1.5 | 16.0 | 48.3... | C21 H14 78Se <sup>†</sup>           |
|          | 344.0269   | -0.5 | -1.5 | 15.0 | 1.4...  | C20 H14 O 74Se <sup>†</sup>         |
|          | 344.0272   | -0.8 | -2.3 | 2.5  | 96.1... | C12 H25 O 77Se 82Se <sup>†</sup>    |
|          | 344.0254   | 1.0  | 2.9  | 5.0  | 81.8... | C13 H23 N 74Se 77Se <sup>†</sup>    |
|          | 344.0276   | -1.2 | -3.5 | 5.0  | 38.8... | C14 H24 74Se 78Se <sup>†</sup>      |
|          | 344.0276   | -1.2 | -3.5 | 1.0  | 87.8... | C10 H25 N O2 76Se 77Se <sup>†</sup> |
|          | 344.0247   | 1.7  | 4.9  | 16.0 | 93.3... | C20 H13 N 77Se <sup>†</sup>         |

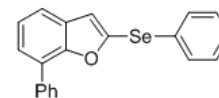

3d

Shanghai Mass Spectrometry Center<sup>†</sup>  
Shanghai Institute of Organic Chemistry<sup>†</sup>  
Chinese Academic of Sciences<sup>†</sup>  
High Resolution MS Data Report<sup>†</sup>

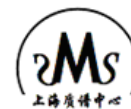

Instrument: Waters Micromass GCT Premier

Ionisation Mode: EI+

Electron Energy: 70eV

Card Serial Number: GCT-P-T11-12-OS0872<sup>†</sup>

Sample Serial Number: HBSF-D11-CW-2<sup>†</sup>

Operator: Li<sup>†</sup>

Date: 2011/11/28<sup>†</sup>

Elemental Composition Report<sup>†</sup>

Single Mass Analysis <sup>†</sup>

Tolerance = 5.0 PPM / DBE: min = -1.5, max = 50.0<sup>†</sup>

Element prediction: Off <sup>†</sup>

Monoisotopic Mass, Odd and Even Electron Ions<sup>†</sup>

560 formula(e) evaluated with 5 results within limits (all results (up to 1000) for each mass)<sup>†</sup>

Elements Used:<sup>†</sup>

C: 0-60 H: 0-80 O: 0-6 74Se: 0-1 76Se: 0-1 77Se: 0-1 78Se: 0-1 80Se: 0-1 82Se: 0-1

<sup>†</sup>

Minimum: -1.5<sup>†</sup>

Maximum: 2.0 5.0 50.0<sup>†</sup>

| Mass     | Calc. Mass | mDa  | PPM  | DBE  | i-FIT     | Formula <sup>†</sup>            |
|----------|------------|------|------|------|-----------|---------------------------------|
| 296.0267 | 296.0269   | -0.2 | -0.7 | 12.0 | 2773020.0 | C17 H14 78Se <sup>†</sup>       |
|          | 296.0269   | -0.2 | -0.7 | 11.0 | 2773012.8 | C16 H14 O 74Se <sup>†</sup>     |
|          | 296.0262   | 0.5  | 1.7  | 22.0 | 2773032.0 | C23 H4 O <sup>†</sup>           |
|          | 296.0272   | -0.5 | -1.7 | -1.5 | 2773034.5 | C8 H25 O 77Se 82Se <sup>†</sup> |
|          | 296.0276   | -0.9 | -3.0 | 1.0  | 2773024.5 | C10 H24 74Se 78Se <sup>†</sup>  |

<sup>†</sup>

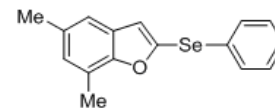

3e

Shanghai Mass Spectrometry Center<sup>†</sup>  
Shanghai Institute of Organic Chemistry<sup>†</sup>  
Chinese Academic of Sciences<sup>†</sup>  
High Resolution MS Data Report<sup>†</sup>

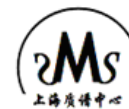

Instrument: Waters Micromass GCT Premier

Ionisation Mode: EI+

Electron Energy: 70eV

Card Serial Number: GCT-P-T11-12-OS0874<sup>†</sup>

Sample Serial Number: HBSF-D11-CW-4<sup>†</sup>

Operator: Li<sup>†</sup>

Date: 2011/11/28<sup>†</sup>

Elemental Composition Report<sup>†</sup>

Single Mass Analysis <sup>†</sup>

Tolerance = 5.0 PPM / DBE: min = -1.5, max = 50.0<sup>†</sup>

Element prediction: Off <sup>†</sup>

Monoisotopic Mass, Odd and Even Electron Ions<sup>†</sup>

498 formula(e) evaluated with 5 results within limits (all results (up to 1000) for each mass)<sup>†</sup>

Elements Used:<sup>†</sup>

C: 0-60 H: 0-80 O: 0-6 74Se: 0-1 76Se: 0-1 77Se: 0-1 78Se: 0-1 80Se: 0-1 82Se: 0-1 <sup>†</sup>

<sup>†</sup>

Minimum: -1.5<sup>†</sup>

Maximum: 2.0 5.0 50.0<sup>†</sup>

| Mass     | Calc. Mass | mDa  | PPM  | DBE  | i-FIT     | Formula <sup>†</sup>            |
|----------|------------|------|------|------|-----------|---------------------------------|
| 282.0118 | 282.0119   | -0.1 | -0.4 | 1.0  | 2773050.8 | C9 H22 74Se 78Se <sup>†</sup>   |
|          | 282.0115   | 0.3  | 1.1  | -1.5 | 2773063.5 | C7 H23 O 77Se 82Se <sup>†</sup> |
|          | 282.0113   | 0.5  | 1.8  | 11.0 | 2773013.0 | C15 H12 O 74Se <sup>†</sup>     |
|          | 282.0112   | 0.6  | 2.1  | 12.0 | 2773032.0 | C16 H12 78Se <sup>†</sup>       |
|          | 282.0106   | 1.2  | 4.3  | 22.0 | 2773058.8 | C22 H2 O <sup>†</sup>           |

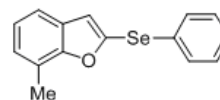

3f

Shanghai Mass Spectrometry Center<sup>†</sup>  
Shanghai Institute of Organic Chemistry<sup>†</sup>  
Chinese Academic of Sciences<sup>†</sup>  
High Resolution MS Data Report<sup>†</sup>

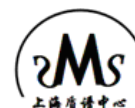

Instrument: Waters Micromass GCT Ionisation Mode: EI<sup>+</sup> Electron Energy: 70eV<sup>†</sup>

Card Serial Number: GCT-T11-11-OS0833<sup>†</sup>

Sample Serial Number: HBSF-LiN9-214<sup>†</sup>

Operator: Li<sup>†</sup>

Date: 2011/11/02<sup>†</sup>

Elemental Composition Report<sup>†</sup>

Single Mass Analysis <sup>†</sup>

Tolerance = 5.0 PPM / DBE: min = -1.5, max = 50.0<sup>†</sup>

Isotope cluster parameters: Separation = 1.0 Abundance = 1.0%<sup>†</sup>

Monoisotopic Mass, Odd and Even Electron Ions<sup>†</sup>

296 formula(e) evaluated with 5 results within limits (all results (up to 1000) for each mass)<sup>†</sup>

| Minimum: |            |      |      | -1.5 <sup>†</sup> |       |                                 |
|----------|------------|------|------|-------------------|-------|---------------------------------|
| Maximum: |            | 2.0  | 5.0  | 50.0 <sup>†</sup> |       |                                 |
| Mass     | Calc. Mass | mDa  | PPM  | DBE               | Score | Formula <sup>†</sup>            |
| 282.0109 | 282.0112   | -0.3 | -1.1 | 12.0              | 2...  | C16 H12 78Se <sup>†</sup>       |
|          | 282.0106   | 0.3  | 1.2  | 22.0              | 1...  | C22 H2 O <sup>†</sup>           |
|          | 282.0113   | -0.4 | -1.4 | 11.0              | 3...  | C15 H12 O 74Se <sup>†</sup>     |
|          | 282.0115   | -0.6 | -2.2 | -1.5              | 4...  | C7 H23 O 77Se 82Se <sup>†</sup> |
|          | 282.0119   | -1.0 | -3.7 | 1.0               | 5...  | C9 H22 74Se 78Se <sup>†</sup>   |

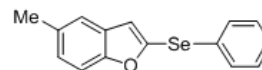

3g

Shanghai Mass Spectrometry Center<sup>†</sup>  
Shanghai Institute of Organic Chemistry<sup>†</sup>  
Chinese Academic of Sciences<sup>†</sup>  
High Resolution MS Data Report<sup>†</sup>

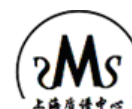

Instrument: Waters Micromass GCT Premier Ionisation Mode: EI<sup>+</sup> Electron Energy: 70eV

Card Serial Number: GCT-P-T11-12-OS0873<sup>†</sup>

Sample Serial Number: HBSF-D11-CW-3<sup>†</sup>

Operator: Li<sup>†</sup>

Date: 2011/11/28<sup>†</sup>

Elemental Composition Report<sup>†</sup>

Single Mass Analysis <sup>†</sup>

Tolerance = 5.0 PPM / DBE: min = -1.5, max = 50.0<sup>†</sup>

Element prediction: Off <sup>†</sup>

Monoisotopic Mass, Odd and Even Electron Ions<sup>†</sup>

571 formula(e) evaluated with 5 results within limits (all results (up to 1000) for each mass)<sup>†</sup>

Elements Used:<sup>†</sup>

C: 0-60 H: 0-80 O: 0-6 74Se: 0-1 76Se: 0-1 77Se: 0-1 78Se: 0-1 80Se: 0-1 82Se: 0-1

| Minimum: |            |      |      |                   |          |                                  |  |  |  |
|----------|------------|------|------|-------------------|----------|----------------------------------|--|--|--|
| Maximum: |            | 2.0  | 5.0  | 50.0 <sup>†</sup> |          |                                  |  |  |  |
| Mass     | Calc. Mass | mDa  | PPM  | DBE               | i-FIT    | Formula <sup>†</sup>             |  |  |  |
| 298.0061 | 298.0061   | 0.0  | 0.0  | 12.0              | 114.6... | C16 H12 O 78Se <sup>†</sup>      |  |  |  |
|          | 298.0062   | -0.1 | -0.3 | 11.0              | 3.9...   | C15 H12 O2 74Se <sup>†</sup>     |  |  |  |
|          | 298.0064   | -0.3 | -1.0 | -1.5              | 191.9... | C7 H23 O2 77Se 82Se <sup>†</sup> |  |  |  |
|          | 298.0055   | 0.6  | 2.0  | 22.0              | 181.6... | C22 H2 O2 <sup>†</sup>           |  |  |  |
|          | 298.0068   | -0.7 | -2.3 | 1.0               | 146.3... | C9 H22 O 74Se 78Se <sup>†</sup>  |  |  |  |

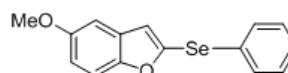

3h

Shanghai Mass Spectrometry Center  
 Shanghai Institute of Organic Chemistry  
 Chinese Academic of Sciences  
 High Resolution MS Data Report

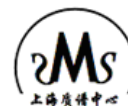

Instrument: Waters Micromass GCT Premier Ionisation Mode: EI+ Electron Energy: 70eV

Card Serial Number: GCT-P-T11-12-OS0878

Sample Serial Number: HBSF-D11-CW-8

Operator: Li

Date: 2011/11/28

Elemental Composition Report

Single Mass Analysis

Tolerance = 5.0 PPM / DBE: min = -1.5, max = 50.0

Element prediction: Off

Monoisotopic Mass, Odd and Even Electron Ions

1017 formula(e) evaluated with 5 results within limits (all results (up to 1000) for each mass)

Elements Used:

C: 0-60 H: 0-80 O: 0-6 Cl: 0-1 74Se: 0-1 76Se: 0-1 77Se: 0-1 78Se: 0-1 80Se: 0-1 82Se: 0-1

Minimum:

Maximum: 2.0 5.0 50.0

| Mass     | Calc. Mass | mDa  | PPM  | DBE  | i-FIT     | Formula               |
|----------|------------|------|------|------|-----------|-----------------------|
| 301.9570 | 301.9569   | 0.1  | 0.3  | 1.5  | 2773127.0 | C7 H17 O3 76Se 77Se   |
|          | 301.9569   | 0.1  | 0.3  | -1.5 | 2773128.3 | C6 H20 O Cl 77Se 82Se |
|          | 301.9573   | -0.3 | -1.0 | 1.0  | 2773113.3 | C8 H19 Cl 74Se 78Se   |
|          | 301.9567   | 0.3  | 1.0  | 11.0 | 2773015.5 | C14 H9 O Cl 74Se      |
|          | 301.9566   | 0.4  | 1.3  | 12.0 | 2773090.5 | C15 H9 Cl 78Se        |

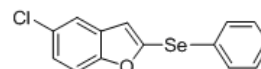

3i

Shanghai Mass Spectrometry Center  
 Shanghai Institute of Organic Chemistry  
 Chinese Academic of Sciences  
 High Resolution MS Data Report

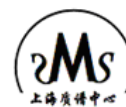

Instrument: Waters Micromass GCT Premier Ionisation Mode: EI+ Electron Energy: 70eV

Card Serial Number: GCT-P-T11-12-OS0871

Sample Serial Number: HBSF-D11-CW-1

Operator: Li

Date: 2011/11/28

Elemental Composition Report

Single Mass Analysis

Tolerance = 5.0 PPM / DBE: min = -1.5, max = 50.0

Element prediction: Off

Monoisotopic Mass, Odd and Even Electron Ions

537 formula(e) evaluated with 3 results within limits (all results (up to 1000) for each mass)

Elements Used:

C: 0-60 H: 0-80 N: 0-4 O: 0-6 S: 0-1 Cl: 0-1 Br: 0-1

Minimum:

Maximum: 2.0 5.0 50.0

| Mass     | Calc. Mass | mDa  | PPM  | DBE  | i-FIT  | Formula        |
|----------|------------|------|------|------|--------|----------------|
| 226.0454 | 226.0452   | 0.2  | 0.9  | 10.0 | 3.5    | C14 H10 O S    |
|          | 226.0457   | -0.3 | -1.3 | 5.5  | 7124.3 | C11 H13 N S Cl |
|          | 226.0464   | -1.0 | -4.4 | 6.5  | 647.9  | C8 H8 N3 O5    |

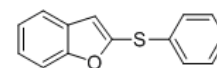

3j



Shanghai Mass Spectrometry Center<sup>†</sup>  
 Shanghai Institute of Organic Chemistry<sup>†</sup>  
 Chinese Academic of Sciences<sup>†</sup>  
 High Resolution MS Data Report<sup>†</sup>

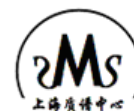

Instrument: Waters Micromass GCT Premier Ionisation Mode: EI+ Electron Energy: 70eV

Card Serial Number: GCT-P-T11-12-OS0876<sup>†</sup>

Sample Serial Number: HBSF-D11-CW-6<sup>†</sup>

Operator: Li<sup>†</sup>

Date: 2011/11/28<sup>†</sup>

Elemental Composition Report<sup>†</sup>

Single Mass Analysis <sup>†</sup>

Tolerance = 5.0 PPM / DBE: min = -1.5, max = 50.0<sup>†</sup>

Element prediction: Off <sup>†</sup>

Monoisotopic Mass, Odd and Even Electron Ions<sup>†</sup>

373 formula(e) evaluated with 3 results within limits (all results (up to 1000) for each mass)<sup>†</sup>

Elements Used:<sup>†</sup>

C: 0-60 H: 0-80 N: 0-2 O: 0-6 S: 0-1 Cl: 0-1 Br: 0-1 <sup>†</sup>

Minimum:

-1.5<sup>†</sup>

Maximum:

50.0<sup>†</sup>

| Mass     | Calc. Mass | mDa  | PPM  | DBE  | i-FIT    | Formula <sup>†</sup>        |
|----------|------------|------|------|------|----------|-----------------------------|
| 240.0610 | 240.0609   | 0.1  | 0.4  | 10.0 | 3.6..    | C15 H12 O S <sup>†</sup>    |
|          | 240.0614   | -0.4 | -1.7 | 5.5  | 822.4..  | C12 H15 N S Cl <sup>†</sup> |
|          | 240.0599   | 1.1  | 4.6  | -0.5 | 1398.9.. | C8 H19 N O2 Br <sup>†</sup> |

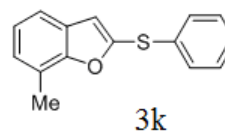

Shanghai Mass Spectrometry Center<sup>†</sup>  
 Shanghai Institute of Organic Chemistry<sup>†</sup>  
 Chinese Academic of Sciences<sup>†</sup>  
 High Resolution MS Data Report<sup>†</sup>

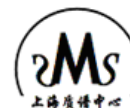

Instrument: Waters Micromass GCT Premier Ionisation Mode: EI+ Electron Energy: 70eV

Card Serial Number: GCT-P-T11-12-OS0937<sup>†</sup>

Sample Serial Number: HBSF-D28-S26<sup>†</sup>

Operator: Li<sup>†</sup>

Date: 2011/12/15<sup>†</sup>

Elemental Composition Report<sup>†</sup>

Single Mass Analysis <sup>†</sup>

Tolerance = 5.0 PPM / DBE: min = -1.5, max = 50.0<sup>†</sup>

Element prediction: Off <sup>†</sup>

<sup>†</sup>

Monoisotopic Mass, Odd and Even Electron Ions<sup>†</sup>

403 formula(e) evaluated with 4 results within limits (all results (up to 1000) for each mass)<sup>†</sup>

Elements Used:<sup>†</sup>

C: 0-60 H: 0-80 N: 0-4 O: 0-6 S: 0-1 Br: 0-1 <sup>†</sup>

<sup>†</sup>

Minimum:

-1.5<sup>†</sup>

Maximum:

50.0<sup>†</sup>

| Mass     | Calc. Mass | mDa  | PPM  | DBE  | i-FIT     | Formula <sup>†</sup>         |
|----------|------------|------|------|------|-----------|------------------------------|
| 282.1079 | 282.1078   | 0.1  | 0.4  | 10.0 | 50.2..    | C18 H18 O S <sup>†</sup>     |
|          | 282.1069   | 1.0  | 3.5  | -0.5 | 13310.2.. | C11 H25 N O2 Br <sup>†</sup> |
|          | 282.1090   | -1.1 | -3.9 | 6.5  | 404.5..   | C12 H16 N3 O5 <sup>†</sup>   |
|          | 282.1065   | 1.4  | 5.0  | 10.5 | 18.9..    | C16 H16 N3 S <sup>†</sup>    |

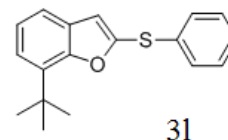

Shanghai Mass Spectrometry Center  
 Shanghai Institute of Organic Chemistry  
 Chinese Academic of Sciences  
 High Resolution MS Data Report

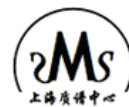

Instrument: Waters Micromass GCT Premier Ionisation Mode: EI+ Electron Energy: 70eV

Card Serial Number: GCT-P-T11-12-OS0938

Sample Serial Number: HBSF-D28-S27

Operator: Li

Date: 2011/12/15

Elemental Composition Report

Single Mass Analysis

Tolerance = 5.0 PPM / DBE: min = -1.5, max = 50.0

Element prediction: Off

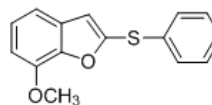

3m

Monoisotopic Mass, Odd and Even Electron Ions

359 formula(e) evaluated with 3 results within limits (all results (up to 1000) for each mass)

Elements Used:

C: 0-60 H: 0-80 N: 0-4 O: 0-6 S: 0-1 Br: 0-1

Minimum: -1.5

Maximum: 50.0

| Mass     | Calc. Mass | mDa  | PPM  | DBE  | i-FIT | Formula        |
|----------|------------|------|------|------|-------|----------------|
| 256.0560 | 256.0558   | 0.2  | 0.8  | 10.0 | 9.3   | C15 H12 O2 S   |
|          | 256.0570   | -1.0 | -3.9 | 6.5  | 25.6  | C9 H10 N3 O6   |
|          | 256.0548   | 1.2  | 4.7  | -0.5 | 722.6 | C8 H19 N O3 Br |

Shanghai Mass Spectrometry Center  
 Shanghai Institute of Organic Chemistry  
 Chinese Academic of Sciences  
 High Resolution MS Data Report

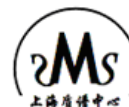

Instrument: Waters Micromass GCT Premier Ionisation Mode: EI+ Electron Energy: 70eV

Card Serial Number: GCT-P-T11-12-OS0875

Sample Serial Number: HBSF-D11-CW-5

Operator: Li

Date: 2011/11/28

Elemental Composition Report

Single Mass Analysis

Tolerance = 5.0 PPM / DBE: min = -1.5, max = 50.0

Element prediction: Off

Monoisotopic Mass, Odd and Even Electron Ions

404 formula(e) evaluated with 3 results within limits (all results (up to 1000) for each mass)

Elements Used:

C: 0-60 H: 0-80 N: 0-2 O: 0-6 S: 0-1 Cl: 0-1 Br: 0-1

Minimum: -1.5

Maximum: 50.0

| Mass     | Calc. Mass | mDa  | PPM  | DBE  | i-FIT   | Formula          |
|----------|------------|------|------|------|---------|------------------|
| 256.0554 | 256.0558   | -0.4 | -1.6 | 10.0 | 40.6    | C15 H12 O2 S     |
|          | 256.0548   | 0.6  | 2.3  | -0.5 | 14143.4 | C8 H19 N O3 Br   |
|          | 256.0563   | -0.9 | -3.5 | 5.5  | 8267.1  | C12 H15 N O S Cl |

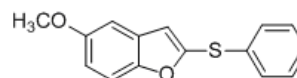

3n

Shanghai Mass Spectrometry Center  
Shanghai Institute of Organic Chemistry  
Chinese Academic of Sciences  
High Resolution MS Data Report

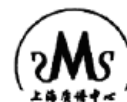

Instrument: Waters Micromass GCT Premier Ionisation Mode: EI+ Electron Energy: 70eV

Card Serial Number: GCT-P-T12-04-OS0317

Sample Serial Number: HBSF-LiA22-S17

Operator: Li

Date: 2012/04/25

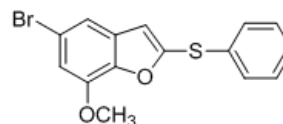

30

Elemental Composition Report

Single Mass Analysis  
Tolerance = 5.0 PPM / DBE: min = -1.5, max = 50.0  
Element prediction: Off

Monoisotopic Mass, Odd and Even Electron Ions  
420 formula(e) evaluated with 3 results within limits (all results (up to 1000) for each mass)  
Elements Used:

C: 0-60 H: 0-80 N: 0-1 O: 0-6 S: 0-1 Br: 0-3 I: 0-1

| Minimum: |            | 2.0  | 5.0  | -1.5 |       |                 |  |
|----------|------------|------|------|------|-------|-----------------|--|
| Maximum: |            |      |      | 50.0 |       |                 |  |
| Mass     | Calc. Mass | mDa  | PPM  | DBE  | i-FIT | Formula         |  |
| 333.9666 | 333.9667   | -0.1 | -0.3 | -0.5 | 262.8 | C8 H18 N Br I   |  |
|          | 333.9663   | 0.3  | 0.9  | 10.0 | 173.7 | C15 H11 O2 S Br |  |
|          | 333.9653   | 1.3  | 3.9  | -0.5 | 246.5 | C8 H18 N O3 Br2 |  |

Shanghai Mass Spectrometry Center  
Shanghai Institute of Organic Chemistry  
Chinese Academic of Sciences  
High Resolution MS Data Report

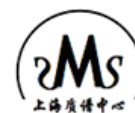

Instrument: Waters Micromass GCT Premier Ionisation Mode: EI+ Electron Energy: 70eV

Card Serial Number: GCT-P-T11-12-OS0877

Sample Serial Number: HBSF-D11-CW-7

Operator: Li

Date: 2011/11/28

Elemental Composition Report

Single Mass Analysis  
Tolerance = 5.0 PPM / DBE: min = -1.5, max = 50.0  
Element prediction: Off

Monoisotopic Mass, Odd and Even Electron Ions  
414 formula(e) evaluated with 3 results within limits (all results (up to 1000) for each mass)  
Elements Used:

C: 0-60 H: 0-80 N: 0-2 O: 0-6 S: 0-1 Cl: 0-1 Br: 0-1

| Minimum: |            | 2.0  | 5.0  | -1.5 |        |               |  |
|----------|------------|------|------|------|--------|---------------|--|
| Maximum: |            |      |      | 50.0 |        |               |  |
| Mass     | Calc. Mass | mDa  | PPM  | DBE  | i-FIT  | Formula       |  |
| 260.0066 | 260.0063   | 0.3  | 1.2  | 10.0 | 81.5   | C14 H9 O S Cl |  |
|          | 260.0069   | -0.3 | -1.2 | 11.0 | 2337.0 | C11 H4 N2 O6  |  |
|          | 260.0075   | -0.9 | -3.5 | 8.5  | 2361.6 | C13 H11 N Br  |  |

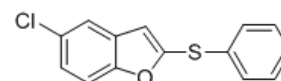

3p

Shanghai Mass Spectrometry Center<sup>†</sup>  
 Shanghai Institute of Organic Chemistry<sup>†</sup>  
 Chinese Academic of Sciences<sup>†</sup>  
 High Resolution MS Data Report<sup>†</sup>

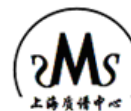

Instrument: Waters Micromass GCT Premier Ionisation Mode: EI+ Electron Energy: 70eV

Card Serial Number: GCT-P-T11-12-OS0936<sup>†</sup>

Sample Serial Number: HBSF-D28-S25<sup>†</sup>

Operator: Li<sup>†</sup>

Date: 2011/12/15<sup>†</sup>

Elemental Composition Report<sup>†</sup>

Single Mass Analysis <sup>†</sup>

Tolerance = 5.0 PPM / DBE: min = -1.5, max = 50.0<sup>†</sup>

Element prediction: Off <sup>†</sup>

Monoisotopic Mass, Odd and Even Electron Ions<sup>†</sup>

446 formula(e) evaluated with 3 results within limits (all results (up to 1000) for each mas:

Elements Used:<sup>†</sup>

C: 0-60 H: 0-80 N: 0-4 O: 0-6 S: 0-1 Br: 0-1 <sup>†</sup>

<sup>†</sup>

Minimum: -1.5<sup>†</sup>

Maximum: 50.0<sup>†</sup>

| Mass     | Calc. Mass | mDa  | PPM  | DBE  | i-FIT   | Formula <sup>†</sup>        |
|----------|------------|------|------|------|---------|-----------------------------|
| 303.9554 | 303.9557   | -0.3 | -1.0 | 10.0 | 8.8...  | C14 H9 O S Br <sup>†</sup>  |
|          | 303.9544   | 1.0  | 3.3  | 10.5 | 3.5...  | C12 H7 N3 S Br <sup>†</sup> |
|          | 303.9569   | -1.5 | -4.9 | 6.5  | 48.2... | C8 H7 N3 O5 Br <sup>†</sup> |

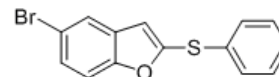

3q

Shanghai Mass Spectrometry Center  
 Shanghai Institute of Organic Chemistry<sup>†</sup>  
 Chinese Academic of Sciences<sup>†</sup>  
 High Resolution MS Data Report<sup>†</sup>

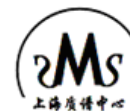

Instrument: Waters Micromass GCT Premier Ionisation Mode: EI+ Electron Energy: 70eV

Card Serial Number: GCT-P-T11-12-OS0939<sup>†</sup>

Sample Serial Number: HBSF-D28-S28<sup>†</sup>

Operator: Li<sup>†</sup>

Date: 2011/12/15<sup>†</sup>

Elemental Composition Report<sup>†</sup>

Single Mass Analysis <sup>†</sup>

Tolerance = 5.0 PPM / DBE: min = -1.5, max = 50.0<sup>†</sup>

Element prediction: Off <sup>†</sup>

<sup>†</sup>

Monoisotopic Mass, Odd and Even Electron Ions<sup>†</sup>

387 formula(e) evaluated with 3 results within limits (all results (up to 1000) for each mass)<sup>†</sup>

Elements Used:<sup>†</sup>

C: 0-60 H: 0-80 N: 0-4 O: 0-6 S: 0-1 Br: 0-1 <sup>†</sup>

<sup>†</sup>

Minimum: -1.5<sup>†</sup>

Maximum: 50.0<sup>†</sup>

| Mass     | Calc. Mass | mDa | PPM | DBE  | i-FIT        | Formula <sup>†</sup>         |
|----------|------------|-----|-----|------|--------------|------------------------------|
| 271.0304 | 271.0303   | 0.1 | 0.4 | 11.0 | 5546827.0... | C14 H9 N O3 S <sup>†</sup>   |
|          | 271.0296   | 0.8 | 3.0 | 20.5 | 5546835.0... | C20 H3 N2 <sup>†</sup>       |
|          | 271.0293   | 1.1 | 4.1 | 0.5  | 5546847.5... | C7 H16 N2 O4 Br <sup>†</sup> |

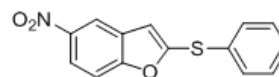

3r

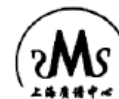

Shanghai Mass Spectrometry Center  
Shanghai Institute of Organic Chemistry  
Chinese Academic of Sciences  
High Resolution MS Data Report

Instrument: Waters Micromass GCT Premier Ionisation Mode: EI+ Electron Energy: 70eV

Card Serial Number: GCT-P-T12-06-OS0576

Sample Serial Number: HBSF-LiJ9-S-38

Operator: Li

Date: 2012/06/26

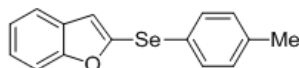

3s

Elemental Composition Report

Single Mass Analysis

Tolerance = 2.0 mDa / DBE: min = -1.5, max = 50.0  
Element prediction: Off

Monoisotopic Mass, Odd and Even Electron Ions

296 formula(e) evaluated with 5 results within limits (all results (up to 1000) for each mass)

Elements Used:

C: 0-60 H: 0-80 O: 0-2 74Se: 0-1 76Se: 0-1 77Se: 0-1 78Se: 0-1 80Se: 0-1 82Se: 0-1

| Minimum: |            |      |      |      |       |                    |
|----------|------------|------|------|------|-------|--------------------|
| Maximum: |            |      |      |      |       |                    |
| Mass     | Calc. Mass | mDa  | PPM  | DBE  | i-FIT | Formula            |
| 282.0112 | 282.0112   | 0.0  | 0.0  | 12.0 | 221.8 | C16 H12 78Se       |
|          | 282.0113   | -0.1 | -0.4 | 11.0 | 5.6   | C15 H12 O 74Se     |
|          | 282.0115   | -0.3 | -1.1 | -1.5 | 559.6 | C7 H23 O 77Se 82Se |
|          | 282.0106   | 0.6  | 2.1  | 22.0 | 512.3 | C22 H2 O           |
|          | 282.0119   | -0.7 | -2.5 | 1.0  | 241.4 | C9 H22 74Se 78Se   |

Shanghai Mass Spectrometry Center  
Shanghai Institute of Organic Chemistry  
Chinese Academic of Sciences  
High Resolution MS Data Report

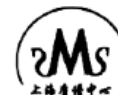

Instrument: Waters Micromass GCT Premier Ionisation Mode: EI+ Electron Energy: 70eV

Card Serial Number: GCT-P-T12-07-OS0652

Sample Serial Number: HBSF-LiJ03-S39

Operator: Li

Date: 2012/07/17

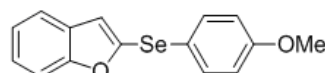

3t

Elemental Composition Report

Single Mass Analysis

Tolerance = 5.0 PPM / DBE: min = -1.5, max = 50.0  
Element prediction: Off

Monoisotopic Mass, Odd and Even Electron Ions

626 formula(e) evaluated with 7 results within limits (all results (up to 1000) for each mass)

Elements Used:

C: 0-60 H: 0-80 N: 0-1 O: 0-2 74Se: 0-1 76Se: 0-1 77Se: 0-1 78Se: 0-1 80Se: 0-1 82Se: 0-1

| Minimum: |            |      |      |      |           |                      |
|----------|------------|------|------|------|-----------|----------------------|
| Maximum: |            |      |      |      |           |                      |
| Mass     | Calc. Mass | mDa  | PPM  | DBE  | i-FIT     | Formula              |
| 298.0059 | 298.0061   | -0.2 | -0.7 | 12.0 | 5546041.5 | C16 H12 O 78Se       |
|          | 298.0062   | -0.3 | -1.0 | 11.0 | 5546042.0 | C15 H12 O2 74Se      |
|          | 298.0055   | 0.4  | 1.3  | 22.0 | 5546033.5 | C22 H2 O2            |
|          | 298.0064   | -0.5 | -1.7 | -1.5 | 5546042.0 | C7 H23 O2 77Se 82Se  |
|          | 298.0068   | -0.9 | -3.0 | 1.0  | 5546041.5 | C9 H22 O 74Se 78Se   |
|          | 298.0047   | 1.2  | 4.0  | 1.0  | 5546041.5 | C8 H21 N O 74Se 77Se |
|          | 298.0046   | 1.3  | 4.4  | 2.0  | 5546041.0 | C9 H21 N 77Se 78Se   |

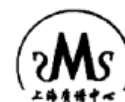

Shanghai Mass Spectrometry Center  
Shanghai Institute of Organic Chemistry  
Chinese Academic of Sciences  
High Resolution MS Data Report

Instrument: Waters Micromass GCT Premier Ionisation Mode: EI+ Electron Energy: 70eV

Card Serial Number: GCT-P-T12-07-OS0653

Sample Serial Number: HBSF-LiJ03-S40

Operator: Li

Date: 2012/07/17

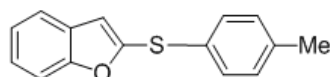

3u

Elemental Composition Report

Single Mass Analysis

Tolerance = 5.0 PPM / DBE: min = -1.5, max = 50.0

Element prediction: Off

Monoisotopic Mass, Odd and Even Electron Ions

203 formula(e) evaluated with 2 results within limits (all results (up to 1000) for each mass)

Elements Used:

C: 0-60 H: 0-80 N: 0-4 O: 0-6 S: 0-1

Minimum: -1.5

Maximum: 50.0

| Mass     | Calc. Mass | mDa  | PPM  | DBE  | i-FIT | Formula      |
|----------|------------|------|------|------|-------|--------------|
| 240.0610 | 240.0609   | 0.1  | 0.4  | 10.0 | 1.6   | C15 H12 O S  |
|          | 240.0620   | -1.0 | -4.2 | 6.5  | 139.1 | C9 H10 N3 O5 |

Shanghai Mass Spectrometry Center  
Shanghai Institute of Organic Chemistry  
Chinese Academic of Sciences  
High Resolution MS Data Report

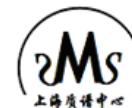

Instrument: Waters Micromass GCT Premier Ionisation Mode: EI+ Electron Energy: 70eV

Card Serial Number: GCT-P-T12-07-OS0677

Sample Serial Number: HBSF-LiO13-S42

Operator: Li

Date: 2012/08/15

Elemental Composition Report

Single Mass Analysis

Tolerance = 5.0 PPM / DBE: min = -1.5, max = 50.0

Element prediction: Off

Monoisotopic Mass, Odd and Even Electron Ions

319 formula(e) evaluated with 2 results within limits (all results (up to 1000) for each mass)

Elements Used:

C: 0-60 H: 0-80 N: 0-2 O: 0-4 S: 0-1 Cl: 0-1 Br: 0-1

Minimum: -1.5

Maximum: 50.0

| Mass     | Calc. Mass | mDa  | PPM  | DBE  | i-FIT  | Formula       |
|----------|------------|------|------|------|--------|---------------|
| 260.0067 | 260.0063   | 0.4  | 1.5  | 10.0 | 9.9    | C14 H9 O S Cl |
|          | 260.0075   | -0.8 | -3.1 | 8.5  | 1679.4 | C13 H11 N Br  |

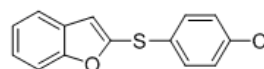

3v

Shanghai Mass Spectrometry Center<sup>+</sup>  
Shanghai Institute of Organic Chemistry<sup>+</sup>  
Chinese Academic of Sciences<sup>+</sup>  
High Resolution MS Data Report<sup>+</sup>

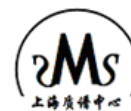

Instrument: Waters Micromass GCT Premier Ionisation Mode: EI+ Electron Energy: 70eV

Card Serial Number: GCT-P-T12-07-0S0678<sup>+</sup>

Sample Serial Number: HBSF-LiO13-S43<sup>+</sup>

Operator: Li<sup>+</sup>

Date: 2012/08/15<sup>+</sup>

Elemental Composition Report<sup>+</sup>

Single Mass Analysis <sup>+</sup>

Tolerance = 5.0 PPM / DBE: min = -1.5, max = 50.0<sup>+</sup>

Element prediction: Off <sup>+</sup>

Monoisotopic Mass, Odd and Even Electron Ions<sup>+</sup>

345 formula(e) evaluated with 2 results within limits (all results (up to 1000) for each mass)<sup>+</sup>

Elements Used:<sup>+</sup>

C: 0-60 H: 0-80 N: 0-2 O: 0-4 S: 0-1 Cl: 0-1 Br: 0-1 <sup>+</sup>

Minimum:

Maximum: -1.5<sup>+</sup>

Mass Calc. Mass mDa PPM DBE i-FIT Formula<sup>+</sup>

| Mass     | Calc. Mass | mDa | PPM | DBE  | i-FIT     | Formula <sup>+</sup>        |
|----------|------------|-----|-----|------|-----------|-----------------------------|
| 276.0614 | 276.0614   | 0.0 | 0.0 | 8.5  | 5546025.0 | C15 H15 N S Cl <sup>+</sup> |
|          | 276.0609   | 0.5 | 1.8 | 13.0 | 5546025.5 | C18 H12 O S <sup>+</sup>    |

<sup>+</sup>

<sup>+</sup>

<sup>+</sup>

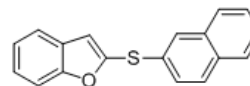

3w

Shanghai Mass Spectrometry Center  
Shanghai Institute of Organic Chemistry  
Chinese Academic of Sciences  
High Resolution MS Data Report

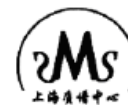

Instrument: Waters Micromass GCT Premier Ionisation Mode: EI+ Electron Energy: 70eV

Card Serial Number: GCT-P-T12-07-0S0654

Sample Serial Number: HBSF-LiJ03-S41

Operator: Li

Date: 2012/07/17

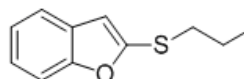

3x

Elemental Composition Report

Single Mass Analysis

Tolerance = 5.0 PPM / DBE: min = -1.5, max = 50.0

Element prediction: Off

Monoisotopic Mass, Odd and Even Electron Ions

163 formula(e) evaluated with 2 results within limits (all results (up to 1000) for each mass)

Elements Used:

C: 0-60 H: 0-80 N: 0-4 O: 0-6 S: 0-1

Minimum:

Maximum: -1.5

Mass Calc. Mass mDa PPM DBE i-FIT Formula

| Mass     | Calc. Mass | mDa  | PPM  | DBE | i-FIT     | Formula      |
|----------|------------|------|------|-----|-----------|--------------|
| 192.0611 | 192.0609   | 0.2  | 1.0  | 6.0 | 4.0       | C11 H12 O S  |
|          | 192.0620   | -0.9 | -4.7 | 2.5 | 2773014.5 | C5 H10 N3 O5 |
